# Supplementary material for: Dioxygen concentration-dependent selective hydroxysulfonylation of olefins by rose bengal-sensitized photocatalysis
Source: Royal Society of Chemistry journal article supplement (doi:10.1039/d3ob01162c), 2023-01-01
Supplement: d3ob01162c1.pdf [file d3ob01162c1.pdf]

## SUPPORTING INFORMATION

### Dioxygen Concentration-Dependent Selective Hydroxysulfonylation of Olefins by Rose Bengal-Sensitized Photocatalysis

Navin Yadav,<sup>a</sup> Soumen Payra,<sup>a</sup> Parag Tamuly<sup>a</sup> and Jarugu Narasimha Moorthy<sup>\*a,b</sup>

<sup>a</sup>*Department of Chemistry, Indian Institute of Technology, Kanpur 208016, India*

<sup>b</sup>*School of Chemistry, Indian Institute of Science Education and Research, Thiruvananthapuram 695551, India*

\*Corresponding Author; E-mail: [moorthy@iitk.ac.in](mailto:moorthy@iitk.ac.in)

#### CONTENTS

---

|   |                                                                                                                |       |
|---|----------------------------------------------------------------------------------------------------------------|-------|
| 1 | Table of contents                                                                                              | 1     |
| 2 | General aspects and reaction setup                                                                             | 2     |
| 3 | KI/starch test for detection of hydrogen peroxide (H <sub>2</sub> O <sub>2</sub> ) in the reaction             | 2     |
| 4 | Absorbance spectra of rose bengal and methylene blue and emission spectrum of blue LED                         | 3     |
| 5 | <sup>1</sup> H NMR monitoring studies                                                                          | 3-5   |
| 6 | General procedure for the preparation of $\beta$ -hydroxysulfones ( <b>3</b> ) and their characterization data | 6-11  |
| 7 | <sup>1</sup> H and <sup>13</sup> C NMR spectra of products                                                     | 12-37 |
| 8 | HR-MS and GC-MS spectra of reaction intermediates                                                              | 38    |
| 9 | References                                                                                                     | 39    |

---

## 1. General aspects

All the chemicals were used as received from commercial sources without any further purification. For the synthesis, solvents were distilled and dried, whenever necessary prior to use. Silica gel (100–200 m mesh) column chromatography was conducted to purify the compounds.  $^1\text{H}$  and  $^{13}\text{C}$  NMR spectra were recorded using 400 and 500 MHz NMR spectrometers. High-resolution mass spectra (HRMS) were recorded using an ESI-QTOF mass spectrometer. All reactions were performed using oven-dried glassware and reaction vials.

## 2. Reaction setup

Typically, the reactions were carried out by irradiating the reaction mixtures contained in glass vials fitted with  $\text{O}_2$  balloon with blue radiation from the light source (Kessil® PR160-440 nm lamp) with 100% intensity. An ambient temperature was maintained during the photoirradiation with a connected compact fan. The approximate distance between the glass vial and the LED lamp source was 4 cm.

## 3. KI/Starch test for the detection of hydrogen peroxide ( $\text{H}_2\text{O}_2$ ) in the reaction

To establish the formation of  $\text{H}_2\text{O}_2$  as the by-product of hydroxysulfonylation reactions, KI/starch test was performed as follows. The reaction mixture containing **1a** (0.25 mmol), **2a** (0.50 mmol), and Rose Bengal (2 mol%) in 1 mL of EtOH was irradiated under  $\text{O}_2$  atmosphere with Blue-LED light for 4 h. Subsequently, the solution of potassium iodide (KI) was added to the reaction mixture followed by starch. The colour of the resulting solution was found to turn light-brown instantaneously.

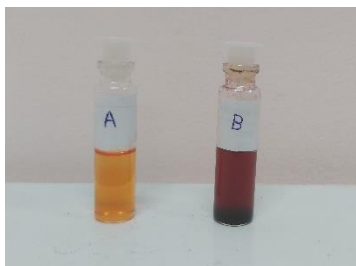

**Solution A:** The reaction mixture after 4 h of irradiation with Blue-LED light ( $\lambda = 440$  nm).

**Solution B:** Observed brown coloration after the addition of the solutions of KI and starch to solution A.

#### 4. Absorption spectra of rose bengal and methylene blue and emission spectra of blue-LED

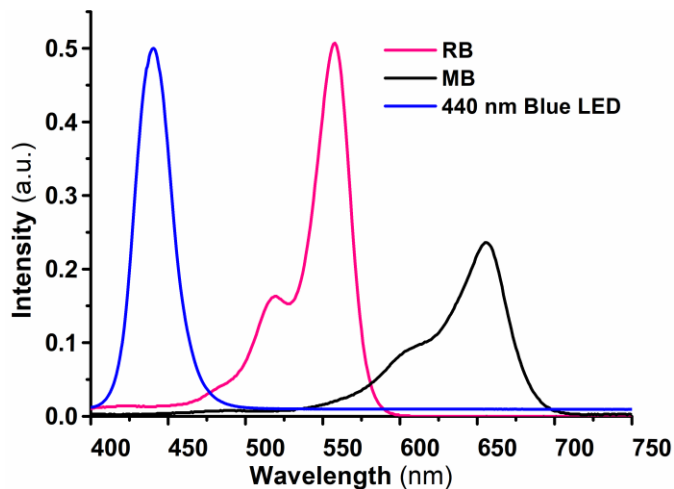

**Fig. S1.** UV-vis spectra of rose bengal (6  $\mu$ M) and methylene blue (6  $\mu$ M) at 25  $^{\circ}$ C in EtOH and 440 nm blue-LED emission spectrum.

#### 5. $^1$ H NMR monitoring studies

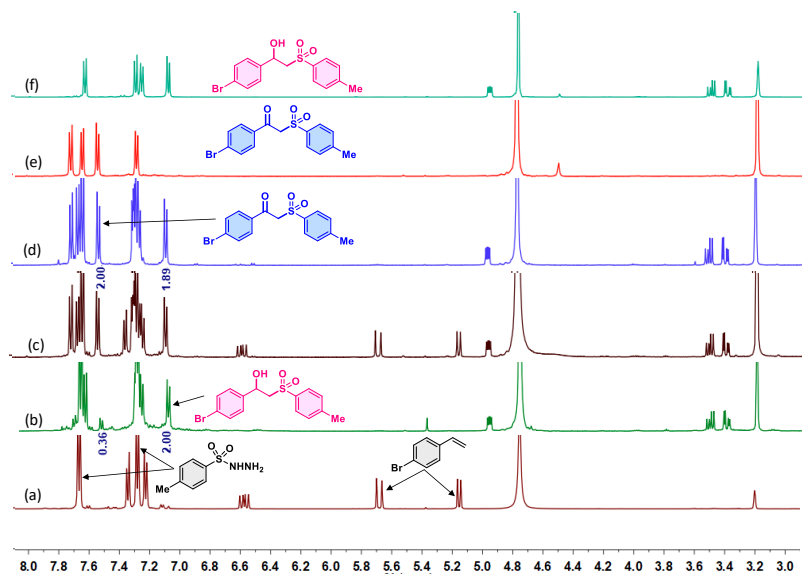

**Fig. S2.**  $^1$ H NMR spectroscopic monitoring of the reaction of 4-bromostyrene (**1F**) and *p*-toluenesulfonyl hydrazide (**2b**) in 1 mL of  $CD_3OD$  under 45 W Blue LED irradiation: (a) at 0 h, (b) after 4 h under  $O_2$ , (c) after 10 h under air and (d) after 24 h under air. (e)  $^1$ H NMR of **4Fb** in  $CD_3OD$ . (f)  $^1$ H NMR spectrum of **3Fb** in  $CD_3OD$ .

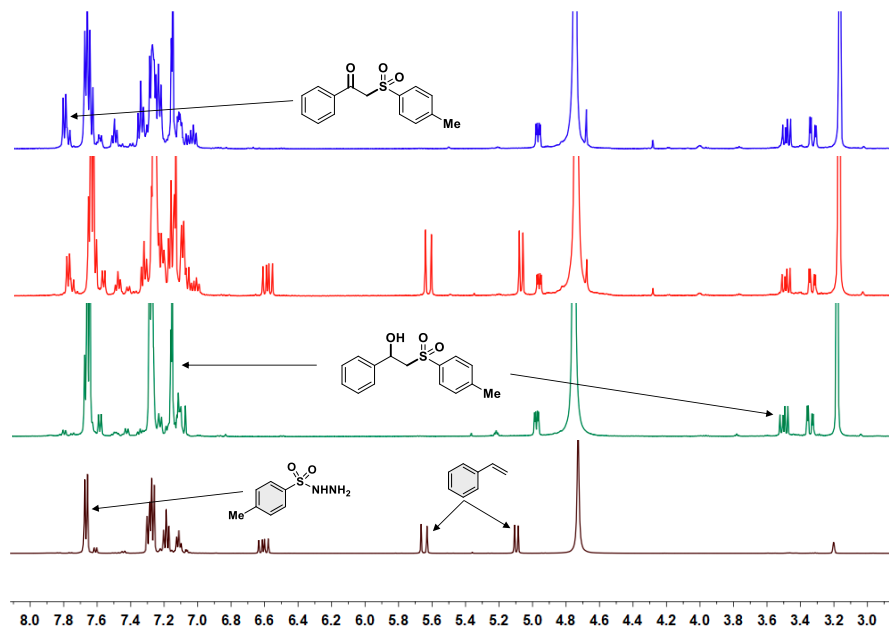

**Fig. S3.**  $^1\text{H}$  NMR spectroscopic monitoring of the reaction of styrene (**1A**) and *p*-toluenesulfonyl hydrazide (**2b**) in 1 mL of  $\text{CD}_3\text{OD}$  under 45 W Blue LED irradiation: (a) at 0 h, (b) after 4 h under  $\text{O}_2$ , (c) after 10 h under air and (d) after 24 h under air.

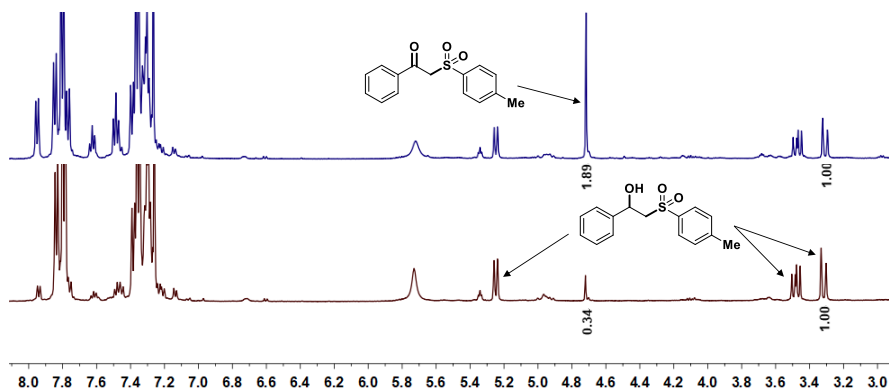

**Fig. S4.**  $^1\text{H}$  NMR of the reaction mixture of the reaction of styrene (**1A**) and *p*-toluenesulfonyl hydrazide (**2b**) in 1 mL of  $\text{CD}_3\text{OD}$  under 45 W blue LED irradiation: (a) under air after 24 h in  $\text{CDCl}_3$  and (b) under  $\text{O}_2$  atmosphere after 4 h in  $\text{CDCl}_3$ .

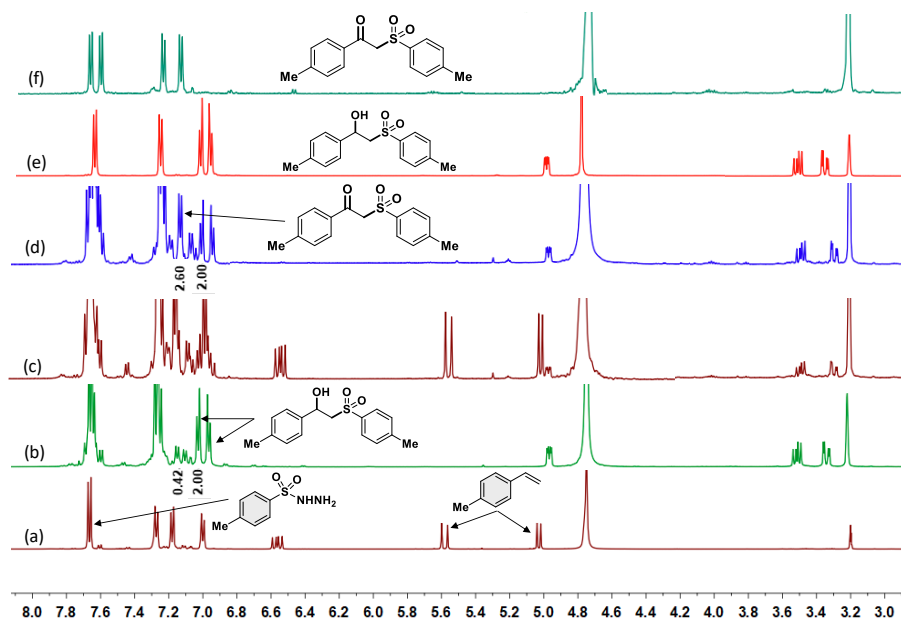

**Fig. S5.**  $^1\text{H}$  NMR spectroscopic monitoring of the reaction of 4-methylstyrene (**1B**) and *p*-toluenesulfonyl hydrazide (**2b**) in 1 mL of  $\text{CD}_3\text{OD}$  under 45 W blue LED irradiation (a) at 0 h, (b) after 4 h under  $\text{O}_2$ , (c) after 10 h under air and (d) after 24 h under air. (e)  $^1\text{H}$  NMR of **3Bb** in  $\text{CD}_3\text{OD}$ . (f)  $^1\text{H}$  NMR spectrum of **4Bb** in  $\text{CD}_3\text{OD}$ .

**Table S1**  $^1\text{H}$  monitoring studies

| Entry | Alkene                                                                              | Sulfonyl hydrazide                                                                  | Medium       | Reaction time (h) | Product distribution<br>$\beta$ -Hydroxysulfone (3): $\beta$ -Ketosulfone (4) |
|-------|-------------------------------------------------------------------------------------|-------------------------------------------------------------------------------------|--------------|-------------------|-------------------------------------------------------------------------------|
| 1     | 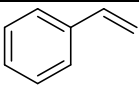 |  | $\text{O}_2$ | 4                 | <b>3Ab:4Ab</b> = 86:14                                                        |
| 2     |  |  | Air          | 24                | <b>3Ab:4Ab</b> = 51:49                                                        |
| 3     |  |  | $\text{O}_2$ | 4                 | <b>3Bb:4Bb</b> = 83:17                                                        |
| 4     |  |  | Air          | 24                | <b>3Bb:4Bb</b> = 44:56                                                        |
| 5     |  |  | $\text{O}_2$ | 4                 | <b>3Fb:4Fb</b> = 85:15                                                        |
| 6     |  |  | Air          | 24                | <b>3Fb:4Fb</b> = 48:52                                                        |

**6. Representative general procedure:** To a glass vial equipped with a septum was charged olefin **1** (0.25 mmol), sulfonyl hydrazide **2**/*N*-hydroxy sulfonamide **5** (0.50 mmol), Rose Bengal (2 mol%) and 1 mL of ethanol. The resulting reaction mixture was purged with O<sub>2</sub> through a septum with the help of a balloon filled with O<sub>2</sub> for 5 min. The contents were stirred under irradiation with a 45 W Blue-LED light under O<sub>2</sub> atmosphere maintained with an oxygen-filled balloon. The progress of the reaction was monitored with thin layer chromatography. After completion of the reaction, the solvent was removed in vacuo, the resulting residue was washed with H<sub>2</sub>O and the organic matter was extracted with EtOAc (30 mL × 3). The combined organic extract was dried over anhyd. Na<sub>2</sub>SO<sub>4</sub> and the solvent removed in vacuo. The resultant crude product was subjected to silica-gel column chromatography using hexane/EtOAc (9:1) to obtain pure  $\beta$ -hydroxysulfone.

**1-Phenyl-2-tosylethan-1-ol (3Ab):**<sup>1</sup> Colorless solid (53 mg, 77%); <sup>1</sup>H NMR (400 MHz, CDCl<sub>3</sub>)  $\delta$  7.84 (d, *J* = 8.0 Hz, 2H), 7.38 (d, *J* = 8.0 Hz, 2H), 7.35 – 7.26 (m, 5H), 5.25 (dd, *J* = 10.0, 1.6 Hz, 1H), 3.48 (dd, *J* = 14.0, 10.0 Hz, 1H), 3.32 (dd, *J* = 14.0, 1.6 Hz, 1H), 2.47 (s, 3H); <sup>13</sup>C NMR (101 MHz, CDCl<sub>3</sub>)  $\delta$  145.4, 140.7, 136.2, 130.2, 128.8, 128.4, 128.1, 125.7, 68.5, 64.0, 21.8.

**1-(*p*-Tolyl)-2-tosylethan-1-ol (3Bb):**<sup>1</sup> Colorless liquid (59 mg, 81%); <sup>1</sup>H NMR (400 MHz, CDCl<sub>3</sub>)  $\delta$  7.83 (d, *J* = 8.2 Hz, 2H), 7.37 (d, *J* = 8.2 Hz, 2H), 7.17 (d, *J* = 8.0 Hz, 2H), 7.12 (d, *J* = 8.0 Hz, 2H), 5.20 (dd, *J* = 10.0, 1.6 Hz, 1H), 3.47 (dd, *J* = 14.0, 10.0 Hz, 1H), 3.30 (dd, *J* = 14.0, 1.6 Hz, 1H), 2.46 (s, 3H), 2.31 (s, 3H); <sup>13</sup>C NMR (101 MHz, CDCl<sub>3</sub>)  $\delta$  145.2, 138.2, 137.9, 136.3, 130.1, 129.4, 128.1, 125.7, 68.4, 64.0, 21.7, 21.2.

**1-(4-(*tert*-Butyl)phenyl)-2-tosylethan-1-ol (3Cb):**<sup>5</sup> Colorless solid (63 mg, 76%); <sup>1</sup>H NMR (400 MHz, CDCl<sub>3</sub>)  $\delta$  7.82 (d, *J* = 8.2 Hz, 2H), 7.37 (d, *J* = 8.2 Hz, 2H), 7.33 (d, *J* = 8.4 Hz, 2H), 7.22 (d, *J* = 8.4 Hz, 2H), 5.23 (dd, *J* = 10.0, 1.5 Hz, 1H), 3.50 (dd, *J* = 14.0, 10.0 Hz, 1H), 3.33 (dd, *J* = 14.0, 1.5 Hz, 1H), 3.12 – 2.96 (bs, 1H), 2.46 (s, 3H), 1.28 (s, 9H); <sup>13</sup>C NMR (101 MHz, CDCl<sub>3</sub>)  $\delta$  151.5, 145.2, 137.7, 136.3, 130.1, 128.1, 125.7, 125.5, 68.4, 63.9, 34.6, 31.3, 21.7.

**1-(4-Fluorophenyl)-2-tosylethan-1-ol (3Db):**<sup>1</sup> Colorless solid (61 mg, 84%); <sup>1</sup>H NMR (500 MHz, CDCl<sub>3</sub>)  $\delta$  7.83 (d, *J* = 8.5 Hz, 2H), 7.39 (d, *J* = 8.0 Hz, 2H), 7.29 – 7.27 (m, 2H), 7.01 (t, *J*

= 8.5 Hz, 2H), 5.25 (dd,  $J = 10.0, 1.5$  Hz, 1H), 3.44 (dd,  $J = 14.0, 10.0$  Hz, 1H), 3.29 (dd,  $J = 14.0, 1.5$  Hz, 1H), 2.47 (s, 3H), 2.16 (s, 1H);  $^{13}\text{C NMR}$  (126 MHz,  $\text{CDCl}_3$ )  $\delta$  163.6, 161.7, 145.5, 136.4 (d,  $J = 52.9$  Hz), 130.3, 128.1, 127.5 (d,  $J = 8.8$  Hz), 115.8 (d,  $J = 21.5$  Hz), 68.0, 64.1, 21.8.

**1-(4-Chlorophenyl)-2-tosylethan-1-ol (3Eb):**<sup>1</sup> Colorless solid (63 mg, 81%);  $^1\text{H NMR}$  (500 MHz,  $\text{CDCl}_3$ )  $\delta$  7.82 (d,  $J = 8.2$  Hz, 2H), 7.39 (d,  $J = 8.2$  Hz, 2H), 7.29 (d,  $J = 8.5$  Hz, 2H), 7.23 (d,  $J = 8.5$  Hz, 2H), 5.24 (dd,  $J = 10.0, 1.0$  Hz, 1H), 3.42 (dd,  $J = 14.4, 10.0$  Hz, 1H), 3.28 (dd,  $J = 14.4, 1.0$  Hz, 1H), 2.47 (s, 3H);  $^{13}\text{C NMR}$  (126 MHz,  $\text{CDCl}_3$ )  $\delta$  145.6, 139.2, 136.1, 134.2, 130.3, 129.0, 128.1, 127.2, 68.0, 64.0, 21.8.

**1-(4-Bromophenyl)-2-tosylethan-1-ol (3Fb):**<sup>1</sup> Colorless solid (69 mg, 78%);  $^1\text{H NMR}$  (400 MHz,  $\text{CDCl}_3$ )  $\delta$  7.81 (d,  $J = 8.0$  Hz, 2H), 7.44 (d,  $J = 8.4$  Hz, 2H), 7.38 (d,  $J = 8.0$  Hz, 2H), 7.17 (d,  $J = 8.4$  Hz, 2H), 5.22 (dd,  $J = 10.0, 1.5$  Hz, 1H), 3.42 (dd,  $J = 14.0, 10.0$  Hz, 1H), 3.28 (dd,  $J = 14.0, 1.5$  Hz, 1H), 2.47 (s, 3H);  $^{13}\text{C NMR}$  (101 MHz,  $\text{CDCl}_3$ )  $\delta$  145.5, 139.7, 136.0, 131.9, 130.3, 128.1, 127.5, 122.3, 68.0, 63.8, 21.8.

**1-(4-Nitrophenyl)-2-tosylethan-1-ol (3Gb):**<sup>5</sup> Colorless solid (47 mg, 58%);  $^1\text{H NMR}$  (400 MHz,  $\text{CDCl}_3$ )  $\delta$  8.18 (d,  $J = 8.7$  Hz, 2H), 7.83 (d,  $J = 8.2$  Hz, 2H), 7.50 (d,  $J = 8.7$  Hz, 2H), 7.40 (d,  $J = 8.2$  Hz, 2H), 5.43 – 5.37 (m, 1H), 4.05 (bs, 1H), 3.43 (dd,  $J = 14.2, 10.0$  Hz, 1H), 3.32 (dd,  $J = 14.2, 2.0$  Hz, 1H), 2.47 (s, 3H);  $^{13}\text{C NMR}$  (101 MHz,  $\text{CDCl}_3$ )  $\delta$  147.8, 147.7, 145.8, 135.8, 130.4, 128.1, 126.7, 124.0, 67.7, 63.7, 21.8.

**1-(*m*-Tolyl)-2-tosylethan-1-ol (3Hb):** Colorless liquid (51 mg, 71%);  $^1\text{H NMR}$  (500 MHz,  $\text{CDCl}_3$ )  $\delta$  7.84 (d,  $J = 8.2$  Hz, 2H), 7.38 (d,  $J = 8.2$  Hz, 2H), 7.20 (t,  $J = 7.6$  Hz, 1H), 7.11 – 7.09 (m, 3H), 5.22 (dd,  $J = 10.0, 1.0$  Hz, 1H), 3.48 (dd,  $J = 14.3, 10.0$  Hz, 1H), 3.32 (dd,  $J = 14.3, 1.0$  Hz, 1H), 2.47 (s, 3H), 2.31 (s, 3H);  $^{13}\text{C NMR}$  (126 MHz,  $\text{CDCl}_3$ )  $\delta$  145.3, 140.7, 138.6, 136.3, 130.2, 129.2, 128.8, 128.1, 126.4, 122.8, 68.6, 64.1, 21.8, 21.5; **HRMS (ESI)**  $m/z$ :  $[\text{M}+\text{Na}^+]$  calcd for  $\text{C}_{16}\text{H}_{18}\text{SO}_3\text{Na}$  313.0874; found 313.0874.

**1-(3-Methoxyphenyl)-2-tosylethan-1-ol (3Ib):** Colorless liquid (49 mg, 64%);  $^1\text{H NMR}$  (400 MHz,  $\text{CDCl}_3$ )  $\delta$  7.83 (d,  $J = 8.2$  Hz, 2H), 7.38 (d,  $J = 8.2$  Hz, 2H), 7.22 (t,  $J = 8.0$  Hz, 1H), 6.88 – 6.77 (m, 3H), 5.25 – 5.19 (m, 1H), 3.77 (s, 3H), 3.46 (dd,  $J = 14.0, 10.0$  Hz, 1H), 3.31 (dd,  $J =$

14.0, 1.7 Hz, 1H), 3.12 (bs, 1H), 2.46 (s, 3H);  $^{13}\text{C}$  NMR (101 MHz,  $\text{CDCl}_3$ )  $\delta$  159.9, 145.3, 142.4, 136.2, 130.2, 129.9, 128.1, 117.9, 113.9, 111.1, 68.4, 64.0, 55.3, 21.8; HRMS (ESI)  $m/z$ :  $[\text{M}+\text{Na}^+]$  calcd for  $\text{C}_{16}\text{H}_{18}\text{SO}_4\text{Na}$  329.0818; found 329.0811.

**1-(3-Bromophenyl)-2-tosylethan-1-ol (3Jb)**: Colorless solid (59 mg, 67%): mp = 124–126 °C;  $^1\text{H}$  NMR (400 MHz,  $\text{CDCl}_3$ )  $\delta$  7.82 (d,  $J$  = 8.3 Hz, 2H), 7.47 – 7.36 (m, 4H), 7.24 – 7.17 (m, 2H), 5.22 (dd,  $J$  = 10.0, 1.5 Hz, 1H), 3.43 (dd,  $J$  = 14.4, 10.0 Hz, 1H), 3.30 (dd,  $J$  = 14.4, 1.5 Hz, 1H), 2.72 (bs, 1H), 2.47 (s, 3H);  $^{13}\text{C}$  NMR (101 MHz,  $\text{CDCl}_3$ )  $\delta$  145.6, 143.0, 136.0, 131.5, 130.4, 130.3, 128.9, 128.1, 124.4, 122.9, 67.9, 63.9, 21.8; HRMS (ESI)  $m/z$ :  $[\text{M}+\text{Na}^+]$  calcd for  $\text{C}_{15}\text{H}_{15}\text{BrSO}_3\text{Na}$  376.9817; found 376.9814.

**1-(Naphthalen-1-yl)-2-tosylethan-1-ol (3Kb)**: Colorless solid (68 mg, 84%): mp = 118–120 °C;  $^1\text{H}$  NMR (400 MHz,  $\text{CDCl}_3$ )  $\delta$  7.90 (d,  $J$  = 8.0 Hz, 2H), 7.87 – 7.83 (m, 1H), 7.76 (dd,  $J$  = 11.9, 8.0 Hz, 2H), 7.56 (d,  $J$  = 8.0 Hz, 1H), 7.49 – 7.38 (m, 5H), 6.05 (dd,  $J$  = 7.2, 3.9 Hz, 1H), 3.84 (s, 1H), 3.51 – 3.48 (m, 2H), 2.49 (s, 3H);  $^{13}\text{C}$  NMR (101 MHz,  $\text{CDCl}_3$ )  $\delta$  145.5, 136.1, 136.0, 133.8, 130.3, 129.4, 129.3, 128.8, 128.3, 126.7, 125.8, 125.7, 123.3, 121.8, 65.3, 63.6, 21.8; HRMS (ESI)  $m/z$ :  $[\text{M}+\text{Na}^+]$  calcd for  $\text{C}_{19}\text{H}_{18}\text{BrSO}_3\text{Na}$  349.0869; found 349.0861.

**2-Phenyl-1-tosylpropan-2-ol (3Lb)**:<sup>1</sup> Colorless solid (66 mg, 91%);  $^1\text{H}$  NMR (500 MHz,  $\text{CDCl}_3$ )  $\delta$  7.47 (d,  $J$  = 8.0 Hz, 2H), 7.28 (d,  $J$  = 8.0 Hz, 2H), 7.18 – 7.15 (m, 4H), 4.65 (s, 1H), 3.70 (d,  $J$  = 14.5 Hz, 1H), 3.59 (d,  $J$  = 14.5 Hz, 1H), 2.38 (s, 3H), 1.70 (s, 3H);  $^{13}\text{C}$  NMR (126 MHz,  $\text{CDCl}_3$ )  $\delta$  144.6, 144.5, 137.4, 129.8, 128.3, 127.6, 127.2, 124.7, 73.2, 66.7, 30.8, 21.6.

**1-((4-Methoxyphenyl)sulfonyl)-2-phenylpropan-2-ol (3Ld)**:<sup>1</sup> Colorless liquid (67 mg, 88%);  $^1\text{H}$  NMR (500 MHz,  $\text{CDCl}_3$ )  $\delta$  7.50 (d,  $J$  = 8.5 Hz, 2H), 7.28 (d,  $J$  = 7.5 Hz, 2H), 7.21 – 7.14 (m, 3H), 6.81 (d,  $J$  = 8.5 Hz, 2H), 4.68 (s, 1H), 3.83 (s, 3H), 3.69 (d,  $J$  = 14.5 Hz, 1H), 3.59 (d,  $J$  = 14.5 Hz, 1H), 1.68 (s, 3H);  $^{13}\text{C}$  NMR (126 MHz,  $\text{CDCl}_3$ )  $\delta$  163.6, 144.6, 132.0, 129.8, 128.3, 127.2, 124.7, 114.4, 73.2, 66.9, 55.8, 30.9.

**1-(Naphthalen-2-ylsulfonyl)-2-phenylpropan-2-ol (3Lf)**:<sup>1</sup> Colorless solid (68 mg, 84%);  $^1\text{H}$  NMR (500 MHz,  $\text{CDCl}_3$ )  $\delta$  8.04 (s, 1H), 7.86 (t,  $J$  = 8.0 Hz, 2H), 7.80 (d,  $J$  = 8.0 Hz, 1H), 7.68 – 7.55 (m, 3H), 7.25 (d,  $J$  = 7.5 Hz, 2H), 7.04 (t,  $J$  = 7.5 Hz, 2H), 6.94 (t,  $J$  = 7.0 Hz, 1H), 4.69 (s, 1H), 3.82 (d,  $J$  = 14.8 Hz, 1H), 3.69 (d,  $J$  = 14.8 Hz, 1H), 1.70 (s, 3H);  $^{13}\text{C}$  NMR (126 MHz,



CDCl<sub>3</sub>) δ 144.2, 137.0, 135.1, 132.0, 129.9, 129.6, 129.5, 129.4, 128.2, 127.9, 127.6, 127.4, 124.7, 122.0, 73.3, 66.6, 31.0.

**1-((4-Nitrophenyl)sulfonyl)-2-phenylpropan-2-ol (3Lg):**<sup>3</sup> Colorless solid (65 mg, 81%); <sup>1</sup>H NMR (500 MHz, CDCl<sub>3</sub>) δ 8.13 (d, *J* = 8.5 Hz, 2H), 7.65 (d, *J* = 8.5 Hz, 2H), 7.19 (d, *J* = 7.5 Hz, 2H), 7.15 – 7.10 (m, 3H), 4.36 (s, 1H), 3.86 (d, *J* = 15.0 Hz, 1H), 3.72 (d, *J* = 15.0 Hz, 1H), 1.67 (s, 3H); <sup>13</sup>C NMR (126 MHz, CDCl<sub>3</sub>) δ 150.4, 145.4, 143.7, 129.1, 128.5, 127.6, 124.9, 124.1, 73.1, 66.9, 31.3.

**2-Phenyl-1-(thiophen-2-ylsulfonyl)propan-2-ol (3Li):**<sup>7</sup> Colorless solid (59 mg, 83%); <sup>1</sup>H NMR (500 MHz, CDCl<sub>3</sub>) δ 7.59 (d, *J* = 5.0 Hz, 1H), 7.33 (d, *J* = 7.5 Hz, 2H), 7.26 – 7.16 (m, 4H), 6.93 (t, *J* = 5.0 Hz, 1H), 4.47 (s, 1H), 3.86 (d, *J* = 14.5 Hz, 1H), 3.72 (d, *J* = 14.5 Hz, 1H), 1.72 (s, 3H); <sup>13</sup>C NMR (126 MHz, CDCl<sub>3</sub>) δ 144.4, 141.4, 134.3, 134.2, 128.4, 127.8, 127.4, 124.7, 73.3, 68.2, 30.8.

**2-(2-Bromophenyl)-1-tosylpropan-2-ol (3Mb):** Colorless solid (85 mg, 93%); mp = 148–150 °C; <sup>1</sup>H NMR (400 MHz, CDCl<sub>3</sub>) δ 7.92 (dd, *J* = 8.0, 1.0 Hz, 1H), 7.39 – 7.33 (m, 1H), 7.32 (d, *J* = 8.0 Hz, 2H), 7.11 (dd, *J* = 7.8, 1.0 Hz, 1H), 7.06 (d, *J* = 8.0 Hz, 2H), 7.00 (td, *J* = 7.8, 1.6 Hz, 1H), 5.14 (s, 1H), 4.80 (d, *J* = 15.0 Hz, 1H), 3.64 (d, *J* = 15.0 Hz, 1H), 2.36 (s, 3H), 1.73 (s, 3H); <sup>13</sup>C NMR (101 MHz, CDCl<sub>3</sub>) δ 144.4, 142.1, 135.8, 134.6, 129.4, 129.1, 128.6, 127.9, 127.9, 120.1, 73.3, 62.2, 28.2, 21.7; HRMS (ESI) *m/z*: [M+K<sup>+</sup>] calcd for C<sub>16</sub>H<sub>17</sub>BrSO<sub>3</sub>K 406.9713; found 406.9710.

**1-(4-Bromophenyl)-2-((4-methoxyphenyl)sulfonyl)ethan-1-ol (3Fd):**<sup>5</sup> Colorless solid (76 mg, 82%); <sup>1</sup>H NMR (500 MHz, CDCl<sub>3</sub>) δ 7.86 (d, *J* = 8.5 Hz, 2H), 7.44 (d, *J* = 8.0 Hz, 2H), 7.18 (d, *J* = 8.0 Hz, 2H), 7.04 (d, *J* = 8.5 Hz, 2H), 5.22 (d, *J* = 10.0 Hz, 1H), 3.90 (s, 3H), 3.42 (dd, *J* = 14.0, 10.0 Hz, 1H), 3.30 – 3.24 (m, 1H); <sup>13</sup>C NMR (126 MHz, CDCl<sub>3</sub>) δ 164.3, 139.8, 132.0, 130.5, 130.3, 127.5, 122.3, 114.8, 68.1, 64.1, 55.9.

**2-(Phenylsulfonyl)-1-(*p*-tolyl)ethan-1-ol (3Ba):**<sup>4</sup> Colorless solid (56 mg, 82%); <sup>1</sup>H NMR (400 MHz, CDCl<sub>3</sub>) δ 7.96 (d, *J* = 8.0 Hz, 2H), 7.69 (t, *J* = 7.5 Hz, 1H), 7.59 (t, *J* = 7.5 Hz, 2H), 7.18 (d, *J* = 8.0 Hz, 2H), 7.12 (d, *J* = 8.0 Hz, 2H), 5.27 – 5.21 (m, 1H), 3.50 (dd, *J* = 14.5, 10.0 Hz,

1H), 3.33 (dd,  $J = 14.5, 1.8$  Hz, 1H), 2.31 (s, 3H);  $^{13}\text{C}$  NMR (101 MHz,  $\text{CDCl}_3$ )  $\delta$  139.3, 138.3, 137.8, 134.2, 129.5, 129.5, 128.1, 125.7, 68.4, 64.0, 21.2.

**2-((4-Isopropylphenyl)sulfonyl)-1-(*p*-tolyl)ethan-1-ol (3Bc):** Colorless solid (60 mg, 76%): mp = 58–60 °C;  $^1\text{H}$  NMR (500 MHz,  $\text{CDCl}_3$ )  $\delta$  7.86 (d,  $J = 8.3$  Hz, 2H), 7.42 (d,  $J = 8.3$  Hz, 2H), 7.18 (d,  $J = 8.0$  Hz, 2H), 7.12 (d,  $J = 8.0$  Hz, 2H), 5.28 – 5.21 (m, 1H), 3.48 (dd,  $J = 14.0, 10.2$  Hz, 1H), 3.32 (dd,  $J = 14.0, 1.6$  Hz, 1H), 3.01 (m, 1H), 2.83 (bs, 1H), 2.31 (s, 3H), 1.29 (d,  $J = 6.9$  Hz, 6H);  $^{13}\text{C}$  NMR (126 MHz,  $\text{CDCl}_3$ )  $\delta$  155.9, 138.2, 137.8, 136.6, 129.5, 128.2, 127.7, 125.7, 68.4, 64.0, 34.4, 23.7, 21.2; HRMS (ESI)  $m/z$ :  $[\text{M}+\text{Na}^+]$  calcd for  $\text{C}_{18}\text{H}_{22}\text{SO}_3\text{Na}$  341.1187; found 341.1182.

**2-((4-Methoxyphenyl)sulfonyl)-1-(*p*-tolyl)ethan-1-ol (3Bd):** Colorless liquid (66 mg, 87%);  $^1\text{H}$  NMR (400 MHz,  $\text{CDCl}_3$ )  $\delta$  7.87 (d,  $J = 8.8$  Hz, 2H), 7.17 (d,  $J = 8.1$  Hz, 2H), 7.12 (d,  $J = 8.1$  Hz, 2H), 7.03 (d,  $J = 8.8$  Hz, 2H), 5.22 – 5.17 (m, 1H), 3.89 (s, 3H), 3.46 (dd,  $J = 14.3, 10.0$  Hz, 1H), 3.29 (dd,  $J = 14.3, 1.8$  Hz, 1H), 2.86 (bs, 1H), 2.31 (s, 3H);  $^{13}\text{C}$  NMR (101 MHz,  $\text{CDCl}_3$ )  $\delta$  164.1, 138.2, 137.8, 130.6, 130.3, 129.5, 125.7, 114.7, 68.5, 64.2, 55.8, 21.2; HRMS (ESI)  $m/z$ :  $[\text{M}+\text{Na}^+]$  calcd for  $\text{C}_{16}\text{H}_{18}\text{SO}_4\text{Na}$  329.0818; found 329.0809.

**2-((4-Chlorophenyl)sulfonyl)-1-(*p*-tolyl)ethan-1-ol (3Be):**<sup>5</sup> Colorless solid (66 mg, 85%);  $^1\text{H}$  NMR (400 MHz,  $\text{CDCl}_3$ )  $\delta$  7.86 (d,  $J = 8.5$  Hz, 2H), 7.53 (d,  $J = 8.5$  Hz, 2H), 7.14 (m, 4H), 5.23 (dd,  $J = 9.9, 2.0$  Hz, 1H), 3.52 (dd,  $J = 14.0, 9.9$  Hz, 1H), 3.32 (dd,  $J = 14.0, 2.0$  Hz, 1H), 2.90 (bs, 1H), 2.32 (s, 3H);  $^{13}\text{C}$  NMR (101 MHz,  $\text{CDCl}_3$ )  $\delta$  140.8, 138.4, 137.9, 137.7, 129.7, 129.6, 129.5, 125.7, 68.5, 64.0, 21.2.

**2-(Naphthalen-2-ylsulfonyl)-1-(*p*-tolyl)ethan-1-ol (3Bf):** Colorless solid (65 mg, 80%): mp = 112–114 °C;  $^1\text{H}$  NMR (400 MHz,  $\text{CDCl}_3$ )  $\delta$  8.52 (s, 1H), 8.01 (t,  $J = 8.1$  Hz, 2H), 7.96 – 7.88 (m, 2H), 7.72 – 7.63 (m, 2H), 7.16 (d,  $J = 8.0$  Hz, 2H), 7.08 (d,  $J = 8.0$  Hz, 2H), 5.27 (dd,  $J = 9.8, 1.7$  Hz, 1H), 3.59 (dd,  $J = 14.5, 9.8$  Hz, 1H), 3.42 (dd,  $J = 14.5, 1.7$  Hz, 1H), 2.27 (s, 3H);  $^{13}\text{C}$  NMR (101 MHz,  $\text{CDCl}_3$ )  $\delta$  138.2, 137.7, 136.0, 135.5, 132.2, 130.1, 129.9, 129.6, 129.6, 129.4, 128.1, 127.9, 125.7, 122.5, 68.5, 63.9, 21.1; HRMS (ESI)  $m/z$ :  $[\text{M}+\text{Na}^+]$  calcd for  $\text{C}_{19}\text{H}_{18}\text{SO}_3\text{Na}$  349.0869; found 349.0860.

**2-((4-Nitrophenyl)sulfonyl)-1-(*p*-tolyl)ethan-1-ol (3Bg):** Colorless solid (59 mg, 74%): mp = 126–128 °C; **<sup>1</sup>H NMR** (400 MHz, CDCl<sub>3</sub>) δ 8.38 (d, *J* = 8.6 Hz, 2H), 8.13 (d, *J* = 8.6 Hz, 2H), 7.15 (m, 4H), 5.30 (dd, *J* = 9.8, 2.0 Hz, 1H), 3.62 (dd, *J* = 14.6, 9.8 Hz, 1H), 3.40 (dd, *J* = 14.6, 2.0 Hz, 1H), 2.32 (s, 3H); **<sup>13</sup>C NMR** (101 MHz, CDCl<sub>3</sub>) δ 150.9, 145.4, 138.8, 137.5, 129.8, 129.7, 125.7, 124.5, 68.8, 64.0, 21.2; **HRMS (ESI)** *m/z*: [M+Na<sup>+</sup>] calcd for C<sub>15</sub>H<sub>15</sub>NSO<sub>5</sub>Na 344.0568; found 344.0562.

**2-(*n*-Butylsulfonyl)-1-(*p*-tolyl)ethan-1-ol (3Bh):** Colorless solid (41 mg, 65%): mp = 69–71 °C; **<sup>1</sup>H NMR** (400 MHz, CDCl<sub>3</sub>) δ 7.27 (d, *J* = 8.0 Hz, 2H), 7.19 (d, *J* = 8.0 Hz, 2H), 5.32 (dd, *J* = 10.0, 1.8 Hz, 1H), 3.40 (dd, *J* = 14.6, 10.0 Hz, 1H), 3.16 – 3.07 (m, 3H), 2.35 (s, 3H), 1.87 – 1.79 (m, 2H), 1.51 – 1.43 (m, 2H), 0.96 (t, *J* = 7.4 Hz, 3H); **<sup>13</sup>C NMR** (101 MHz, CDCl<sub>3</sub>) δ 138.5, 138.3, 129.7, 125.7, 68.9, 60.5, 54.5, 23.9, 21.8, 21.2, 13.6; **HRMS (ESI)** *m/z*: [M+Na<sup>+</sup>] calcd for C<sub>13</sub>H<sub>20</sub>SO<sub>3</sub>Na 279.1025; found 279.1021.

**2-(Thiophen-2-ylsulfonyl)-1-(*p*-tolyl)ethan-1-ol (3Bi):** Colorless liquid (43 mg, 61%); **<sup>1</sup>H NMR** (500 MHz, CDCl<sub>3</sub>) δ 7.76 (d, *J* = 4.5 Hz, 2H), 7.20 (m, 3H), 7.14 (d, *J* = 8.0 Hz, 2H), 5.27 (d, *J* = 10.0 Hz, 1H), 3.62 (dd, *J* = 14.5, 10.0 Hz, 1H), 3.50 (s, 1H), 3.44 (d, *J* = 14.5 Hz, 1H), 2.32 (s, 3H); **<sup>13</sup>C NMR** (126 MHz, CDCl<sub>3</sub>) δ 140.3, 140.2, 138.4, 137.7, 134.6, 129.6, 128.2, 125.7, 68.7, 65.5, 21.2; **HRMS (ESI)** *m/z*: [M+Na<sup>+</sup>] calcd for C<sub>13</sub>H<sub>24</sub>S<sub>2</sub>O<sub>3</sub>Na 305.0277; found 305.0270.

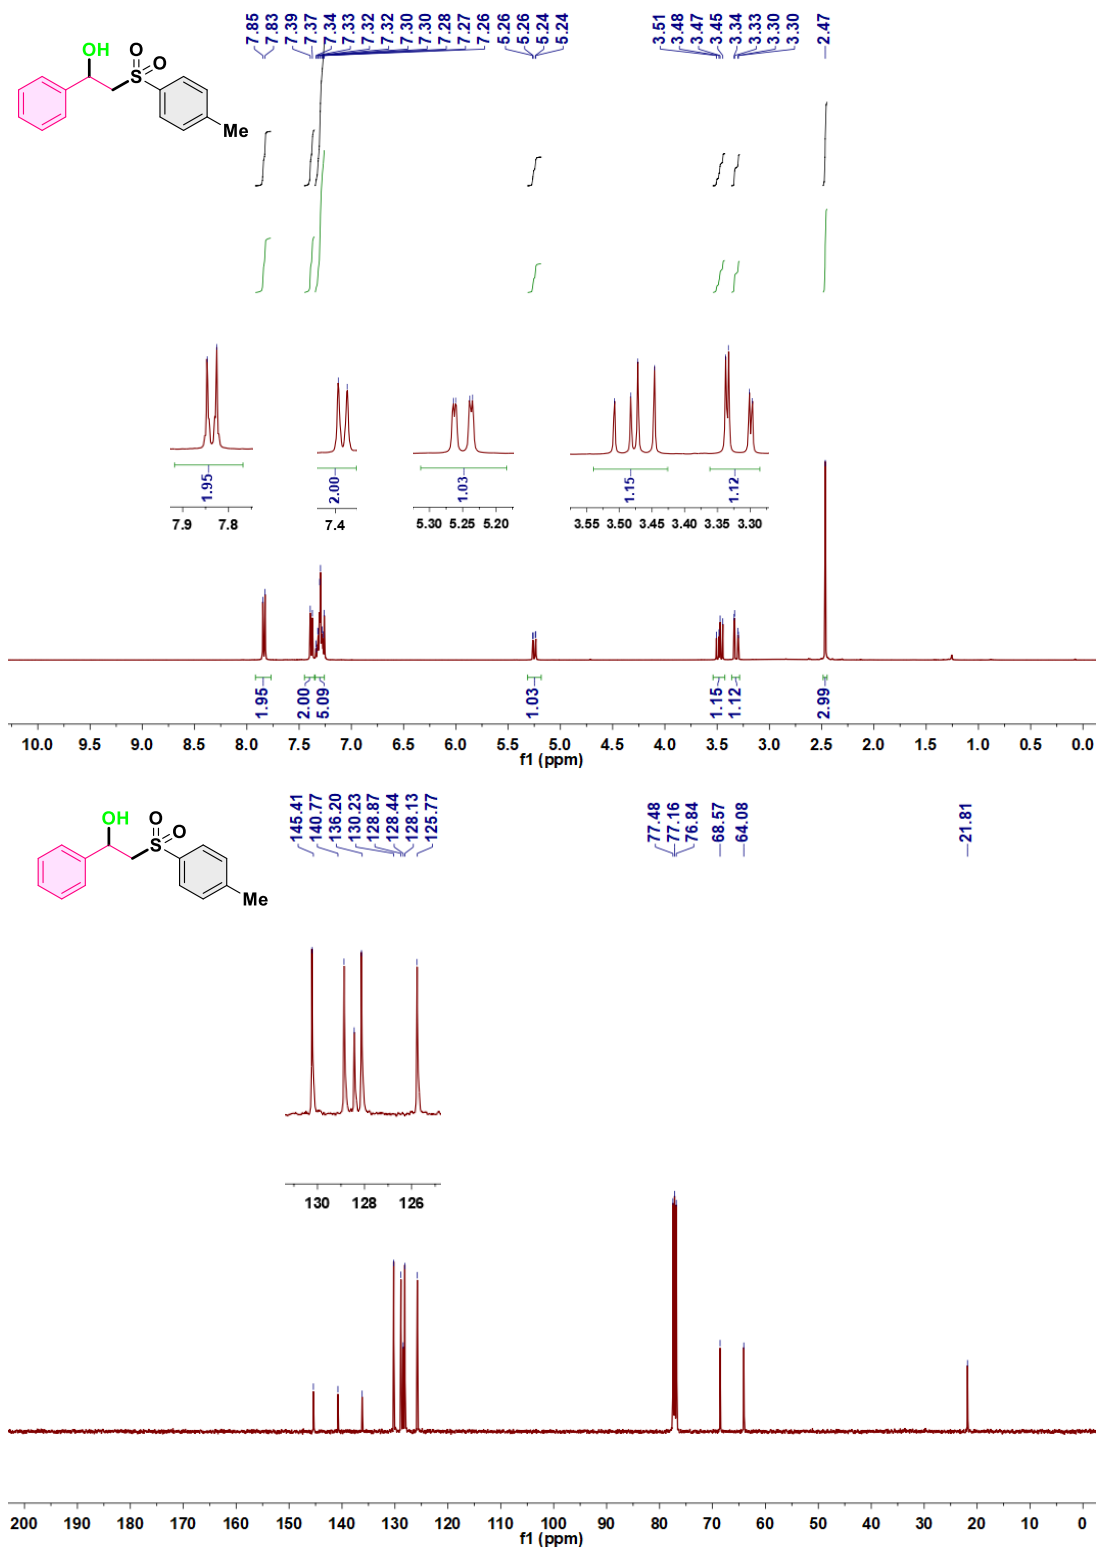

**Fig. S6.** <sup>1</sup>H (400 MHz) and <sup>13</sup>C (101 MHz) NMR spectra of 1-phenyl-2-tosylethan-1-ol (**3Ab**) in CDCl<sub>3</sub>.

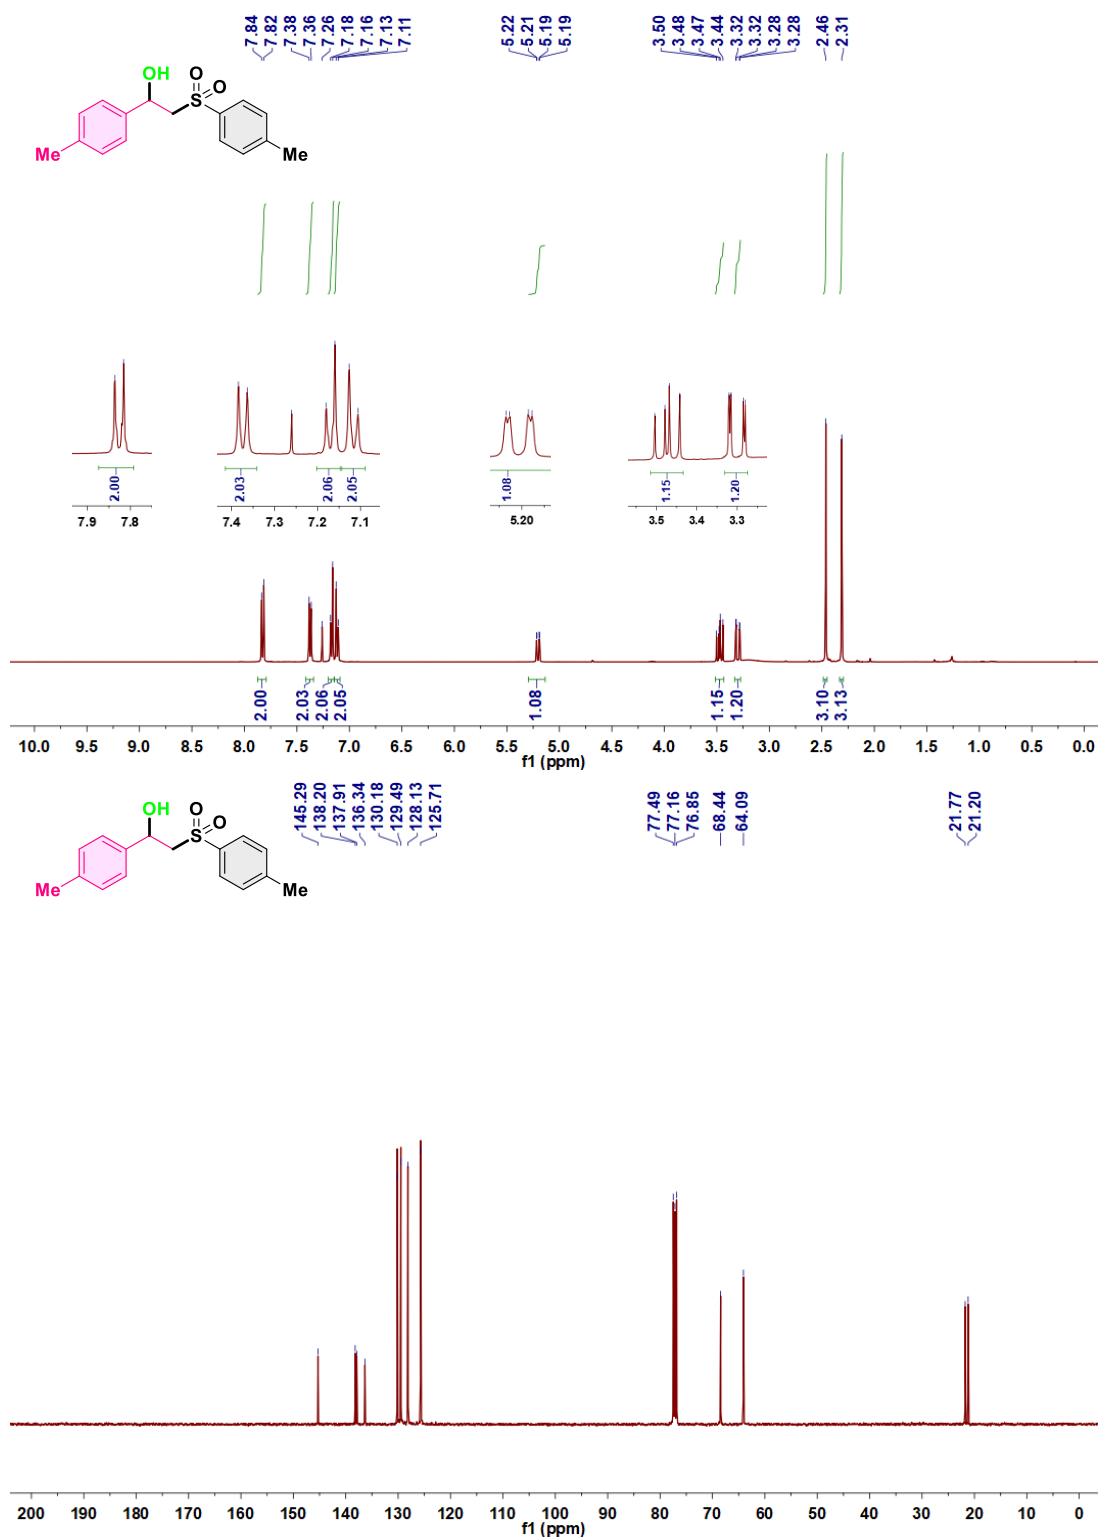

**Fig. S7.** <sup>1</sup>H (400 MHz) and <sup>13</sup>C (101 MHz) NMR spectra of 1-(*p*-tolyl)-2-tosylethan-1-ol (**3Bb**) in CDCl<sub>3</sub>.

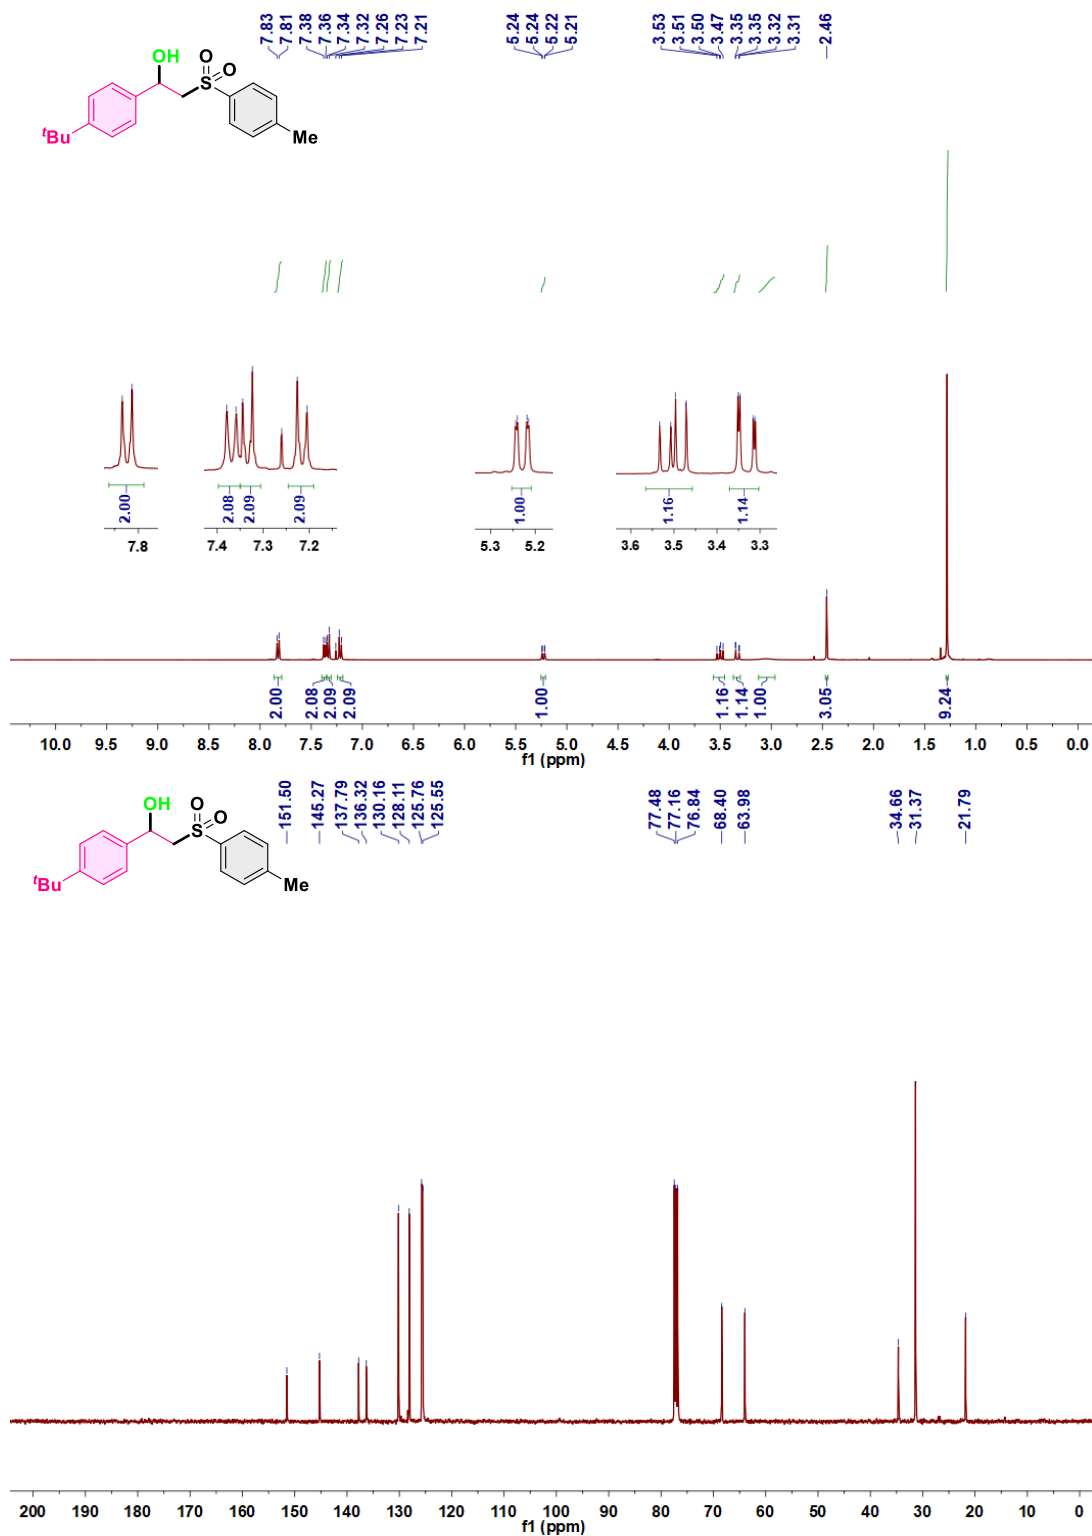

**Fig. S8.** <sup>1</sup>H (400 MHz) and <sup>13</sup>C (101 MHz) NMR spectra of 1-(4-(*tert*-butyl)phenyl)-2-tosylethan-1-ol (**3Cb**) in CDCl<sub>3</sub>.

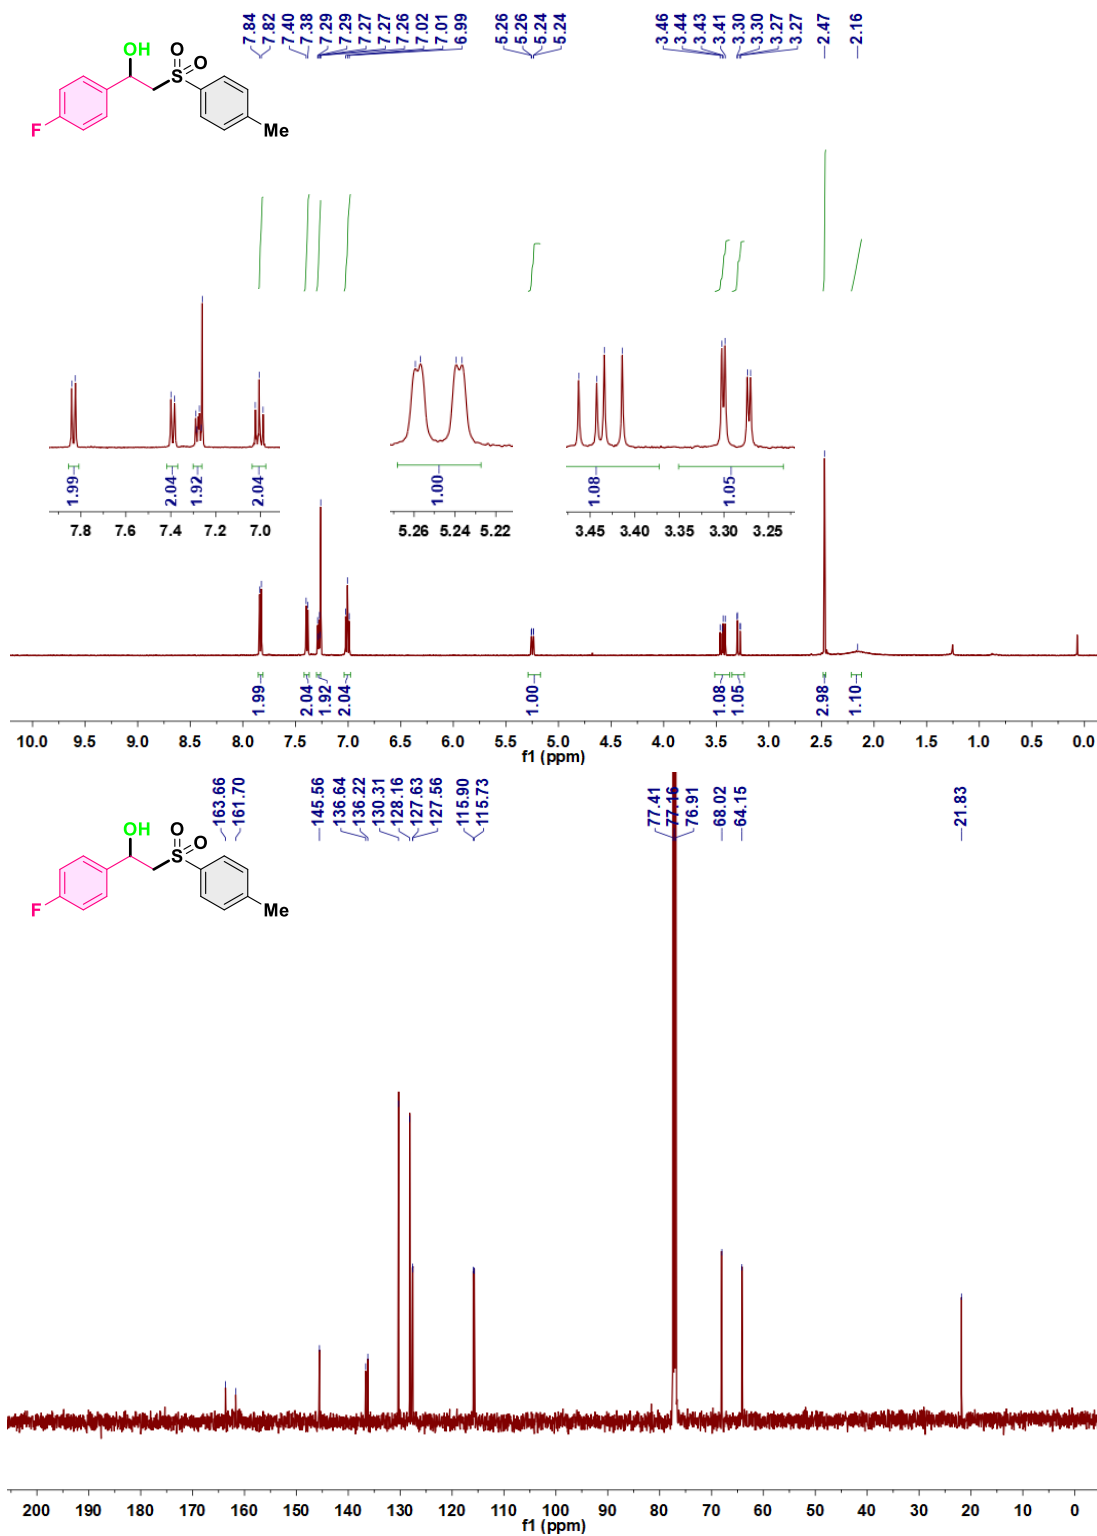

**Fig. S9.** <sup>1</sup>H (500 MHz) and <sup>13</sup>C (126 MHz) NMR spectra of 1-(4-fluorophenyl)-2-tosylethan-1-ol (**3Db**) in CDCl<sub>3</sub>.

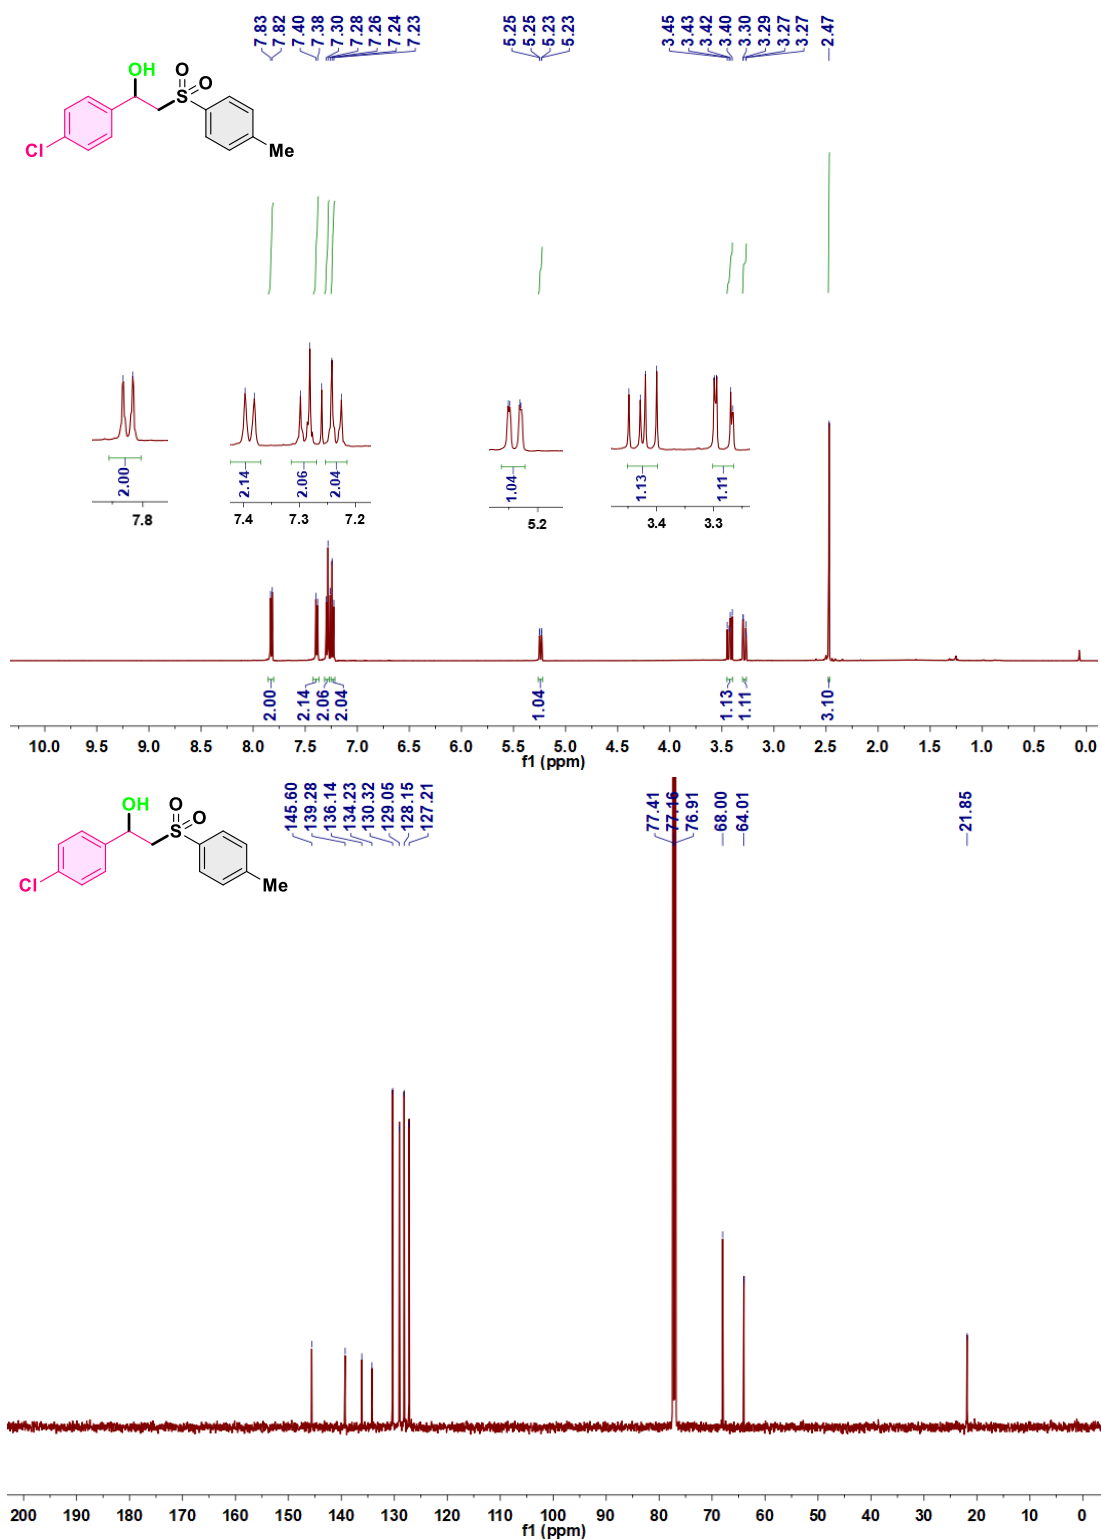

**Fig. S10.** <sup>1</sup>H (500 MHz) and <sup>13</sup>C (126 MHz) NMR spectra of 1-(4-chlorophenyl)-2-tosylethan-1-ol (**3Eb**) in CDCl<sub>3</sub>.



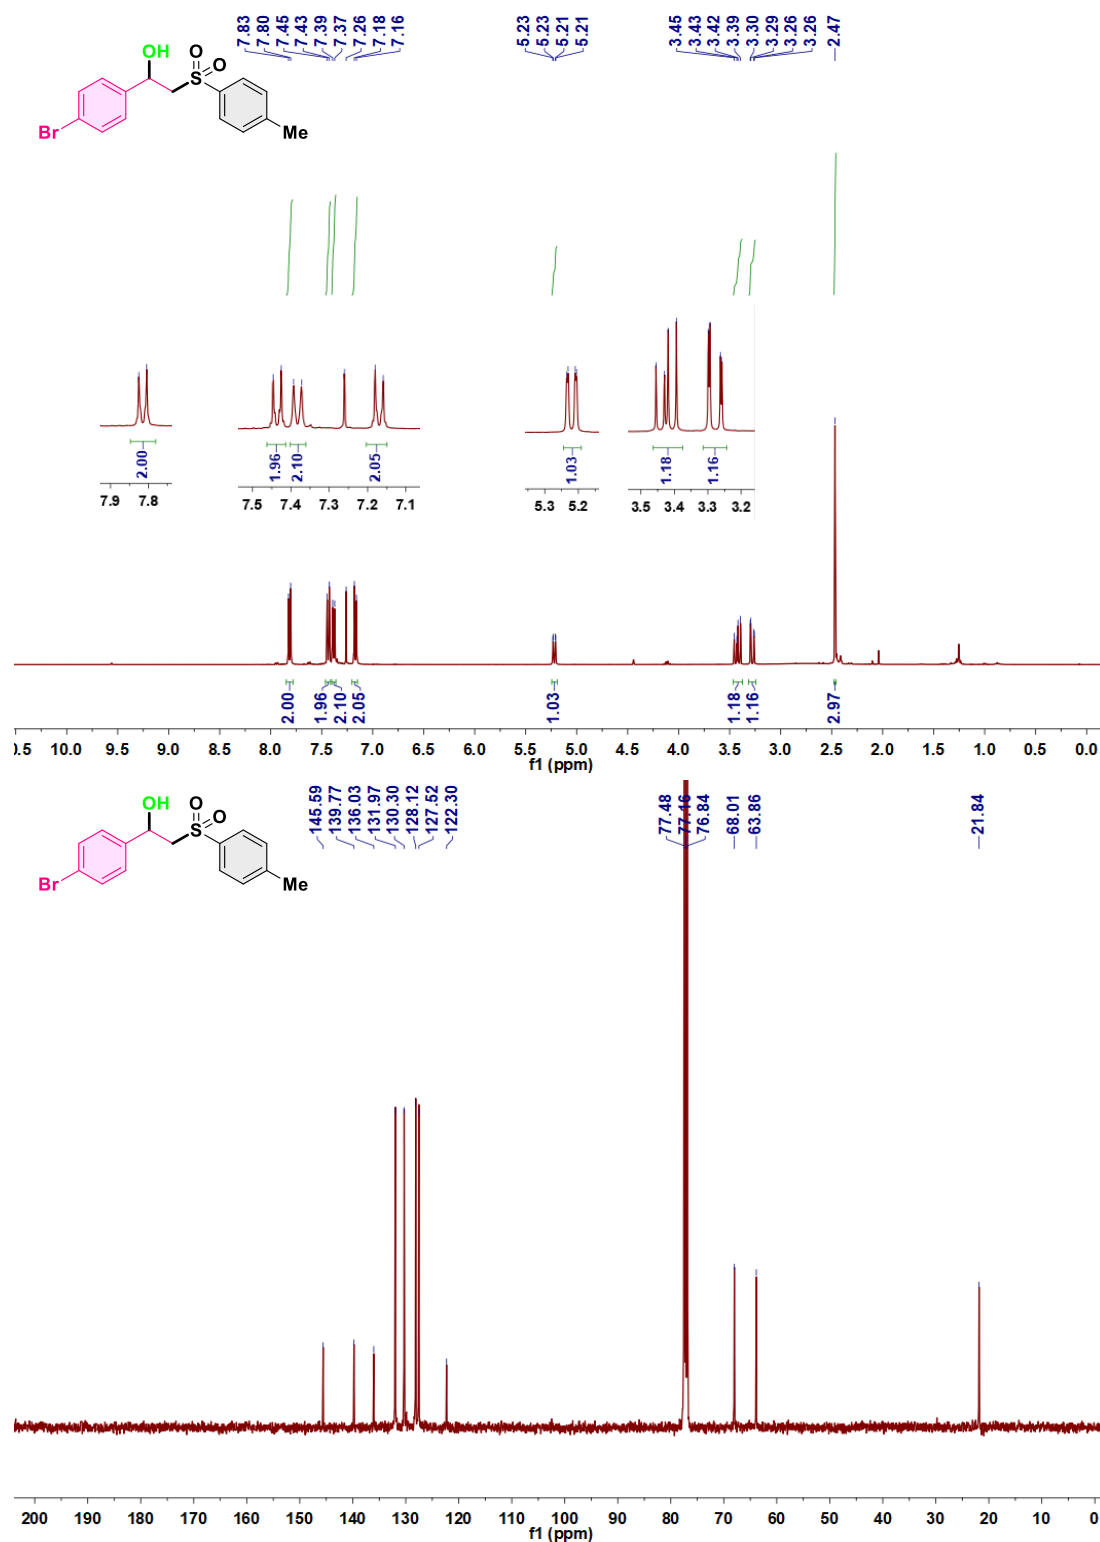

**Fig. S11.** <sup>1</sup>H (400 MHz) and <sup>13</sup>C (101 MHz) NMR spectra of 1-(4-bromophenyl)-2-tosylethan-1-ol (**3Fb**) in CDCl<sub>3</sub>.

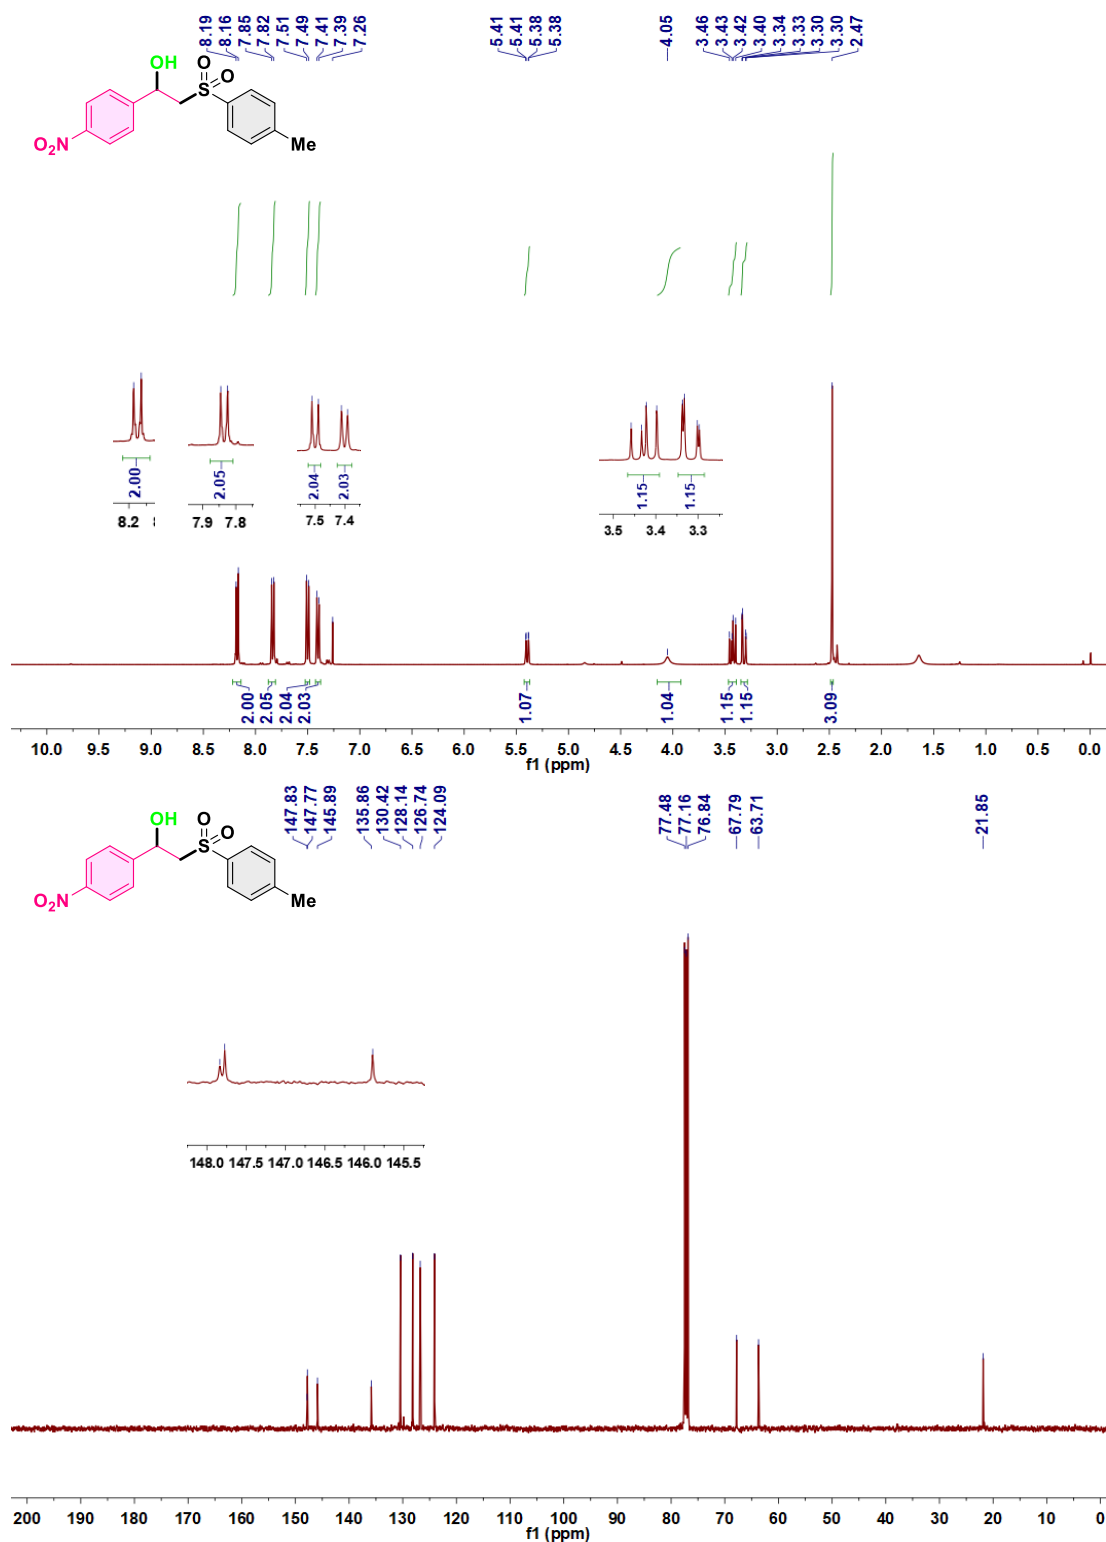

**Fig. S12.** <sup>1</sup>H (400 MHz) and <sup>13</sup>C (101 MHz) NMR spectra of 1-(4-nitrophenyl)-2-tosylethan-1-ol (3Gb) in CDCl<sub>3</sub>.

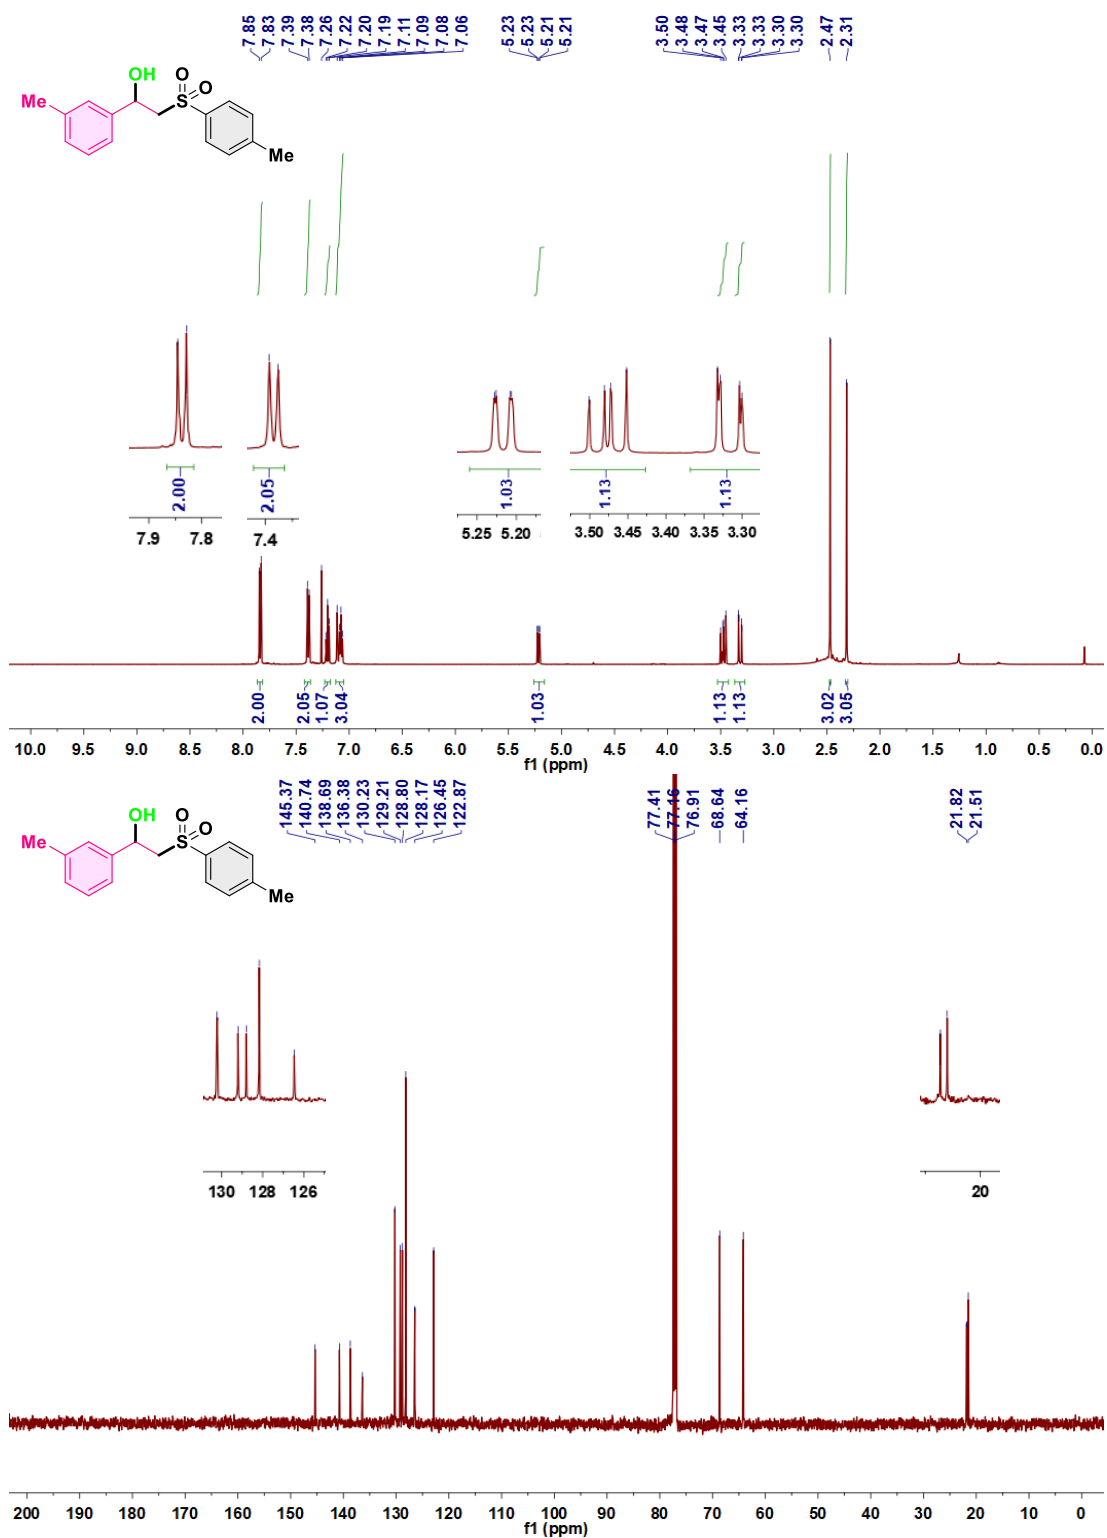

**Fig. S13.** <sup>1</sup>H (500 MHz) and <sup>13</sup>C (126 MHz) NMR spectra of 1-(*m*-tolyl)-2-tosylethan-1-ol (**3Hb**) in CDCl<sub>3</sub>.

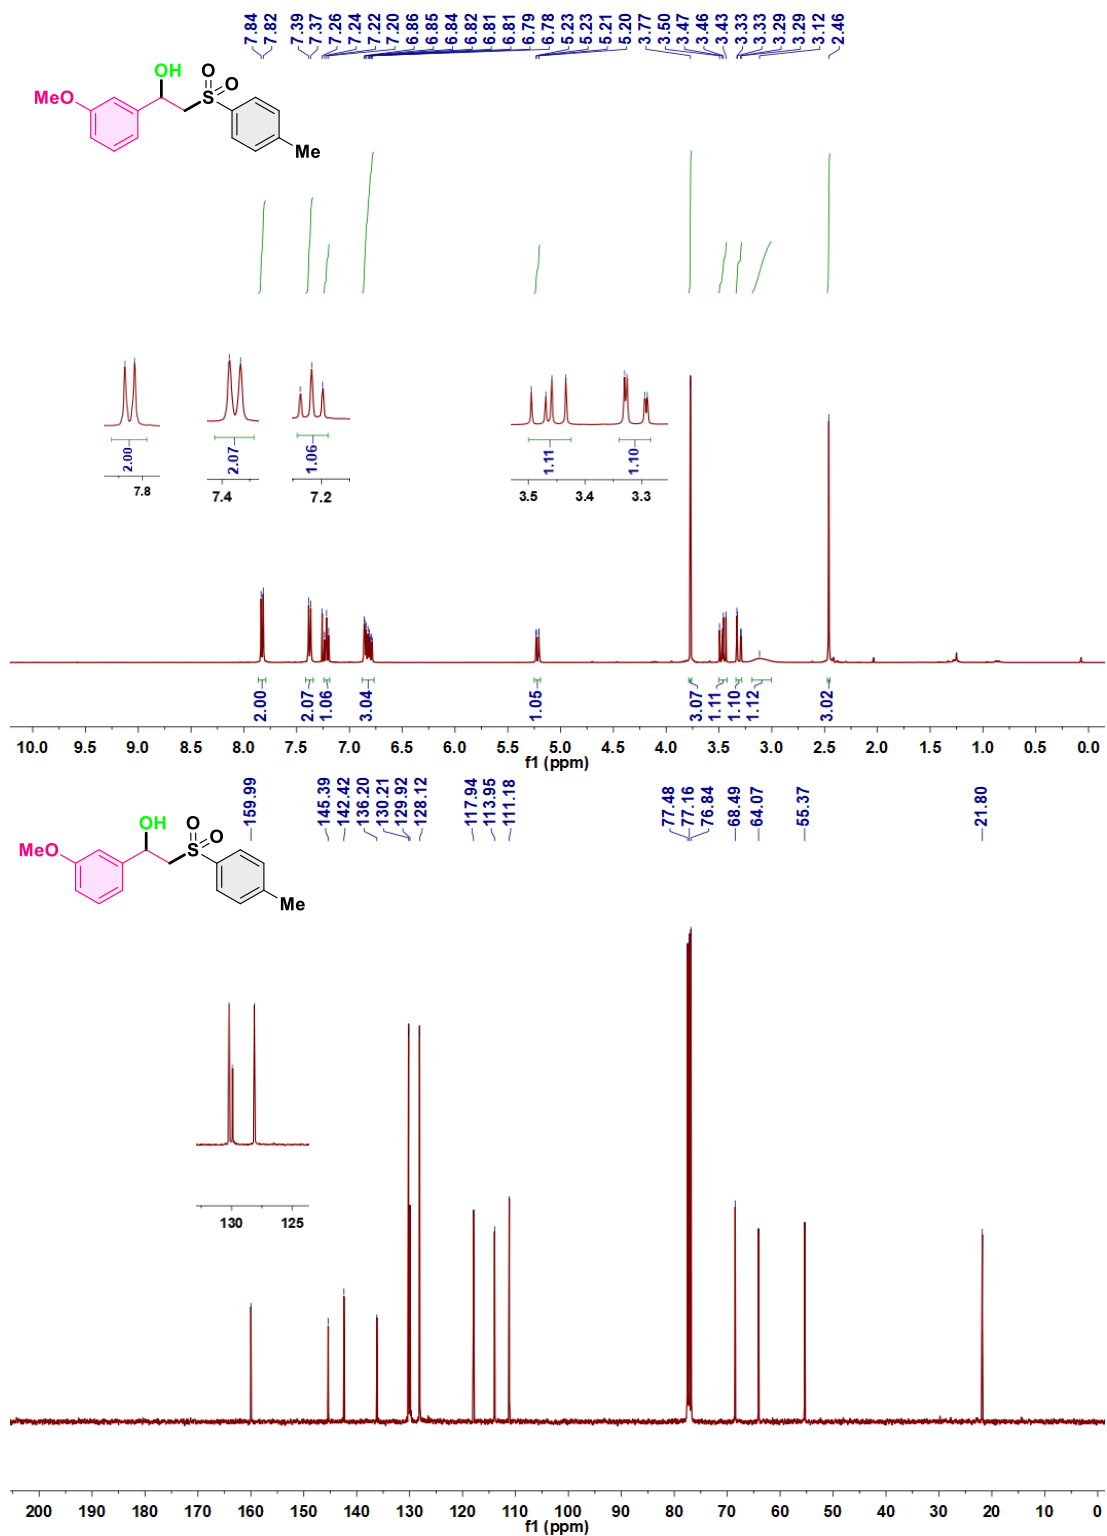

**Fig. S14.** <sup>1</sup>H (400 MHz) and <sup>13</sup>C (101 MHz) NMR spectra of 1-(3-methoxyphenyl)-2-tosylethan-1-ol (**3Ib**) in CDCl<sub>3</sub>.

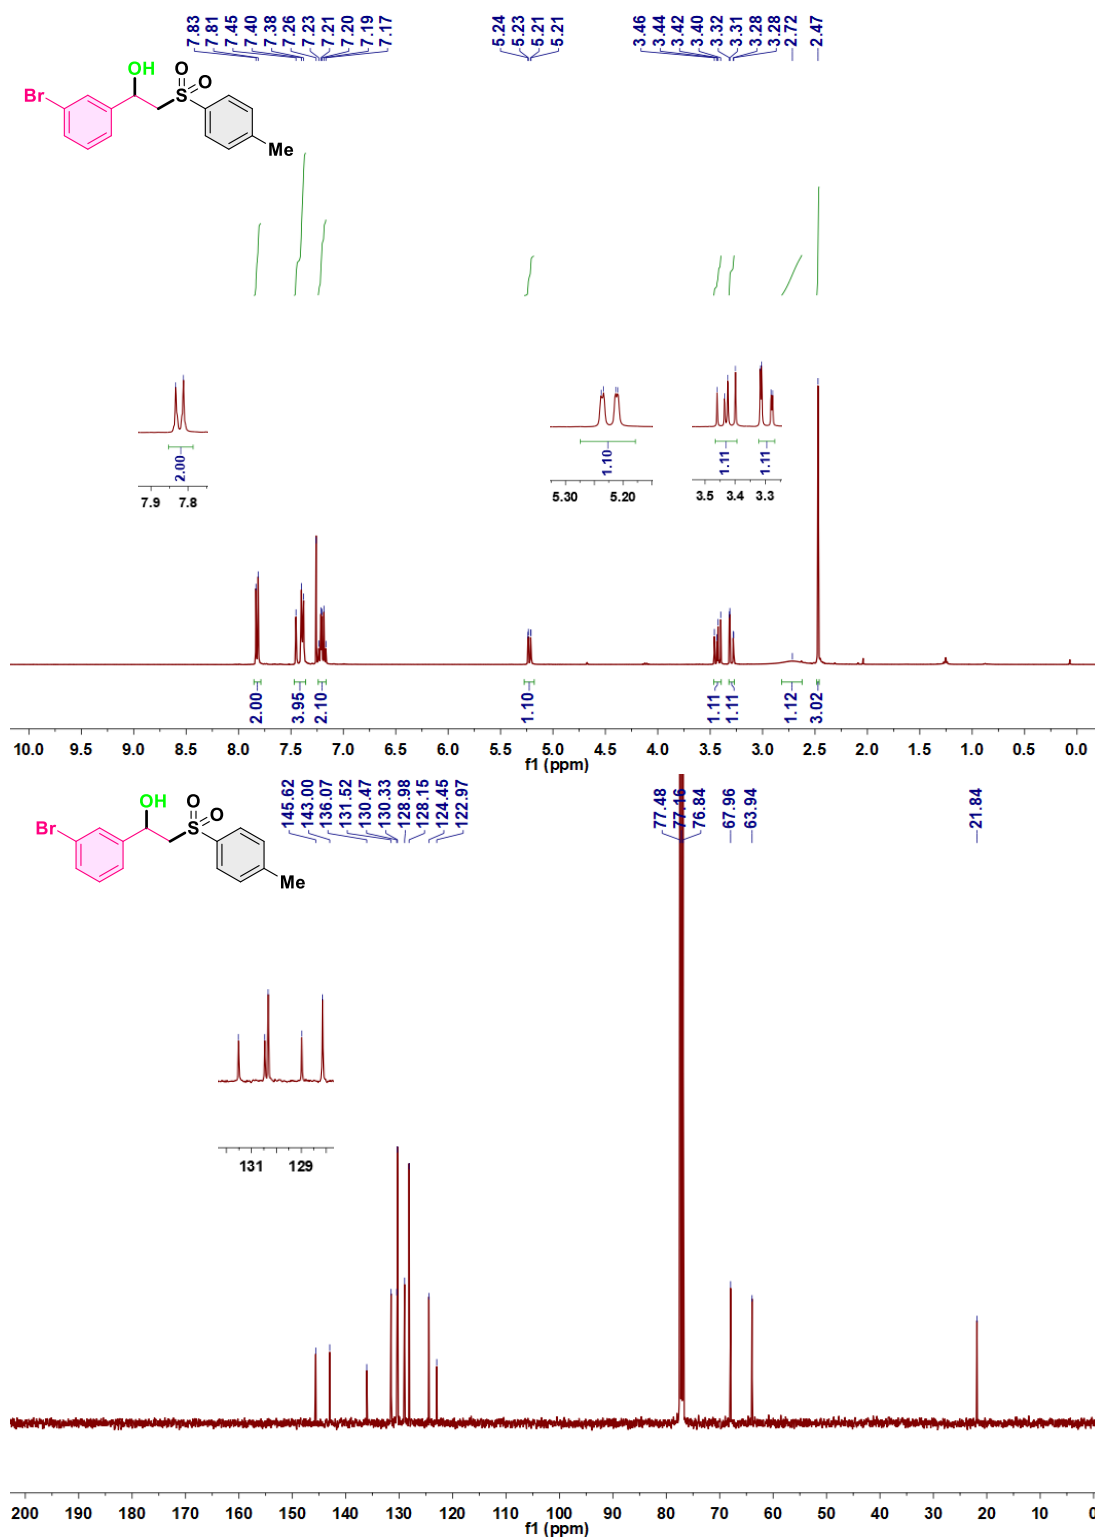

**Fig. S15.** <sup>1</sup>H (400 MHz) and <sup>13</sup>C (101 MHz) NMR spectra of 1-(3-bromophenyl)-2-tosylethan-1-ol (**3Jb**) in CDCl<sub>3</sub>.

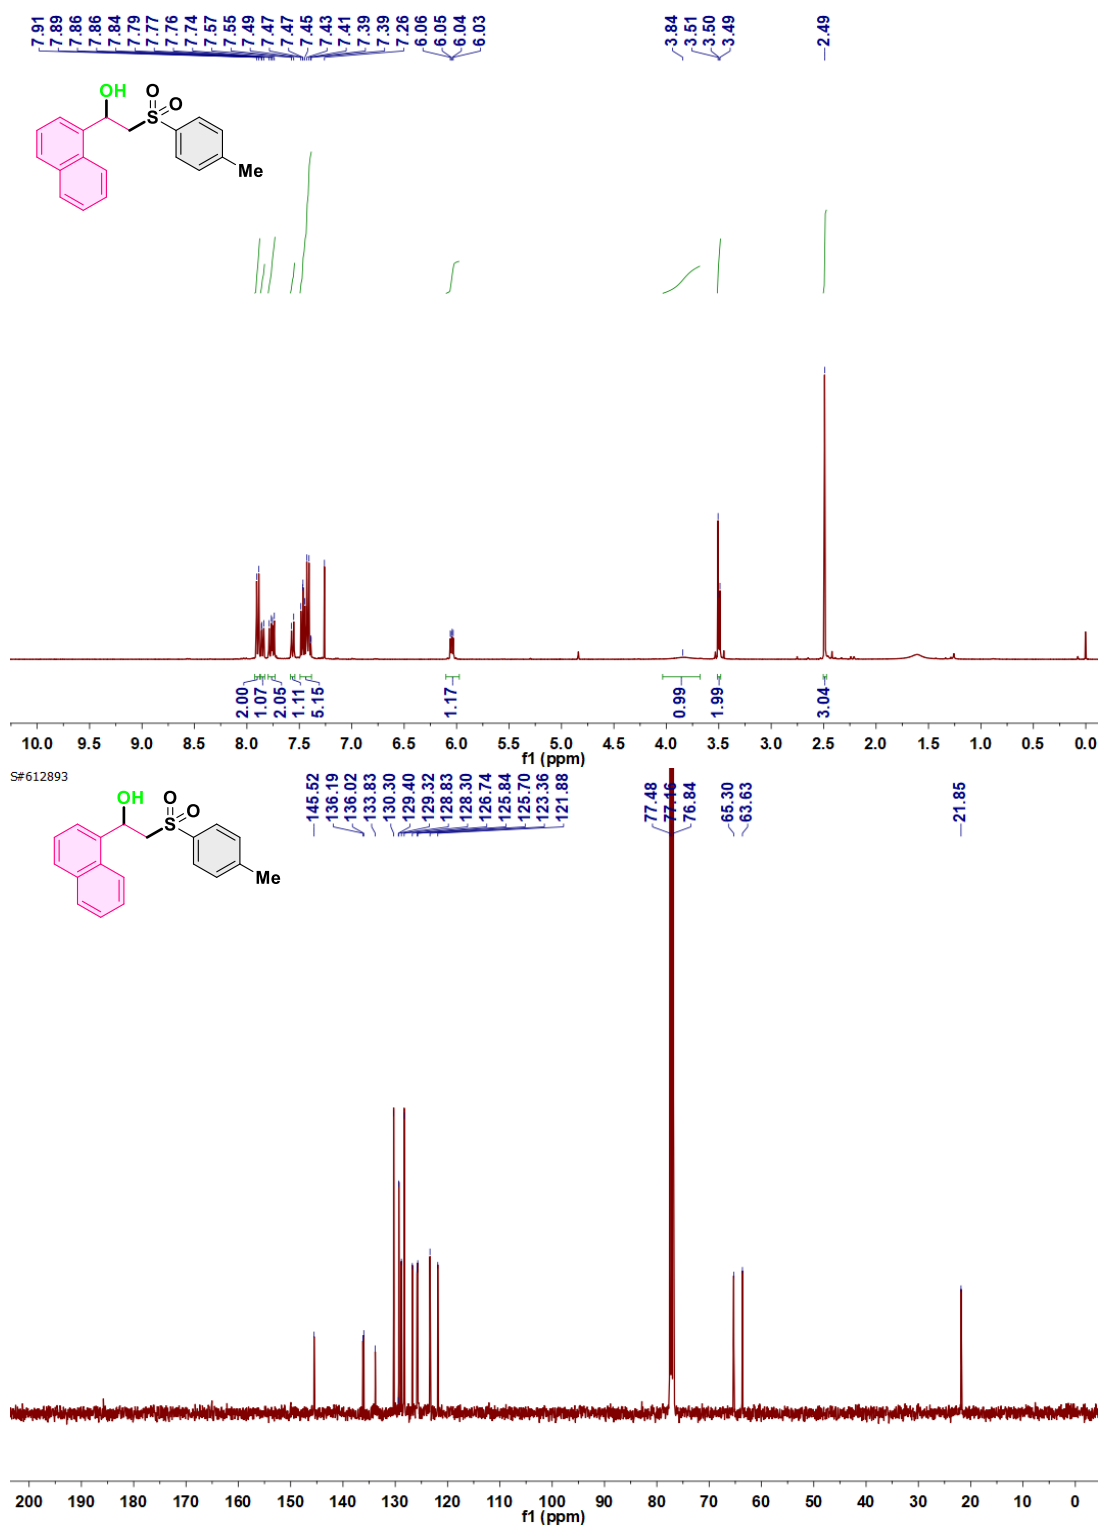

**Fig. S16.** <sup>1</sup>H (400 MHz) and <sup>13</sup>C (101 MHz) NMR spectra of 2-(2-bromophenyl)-1-tosylpropan-2-ol (**3Kb**) in CDCl<sub>3</sub>.

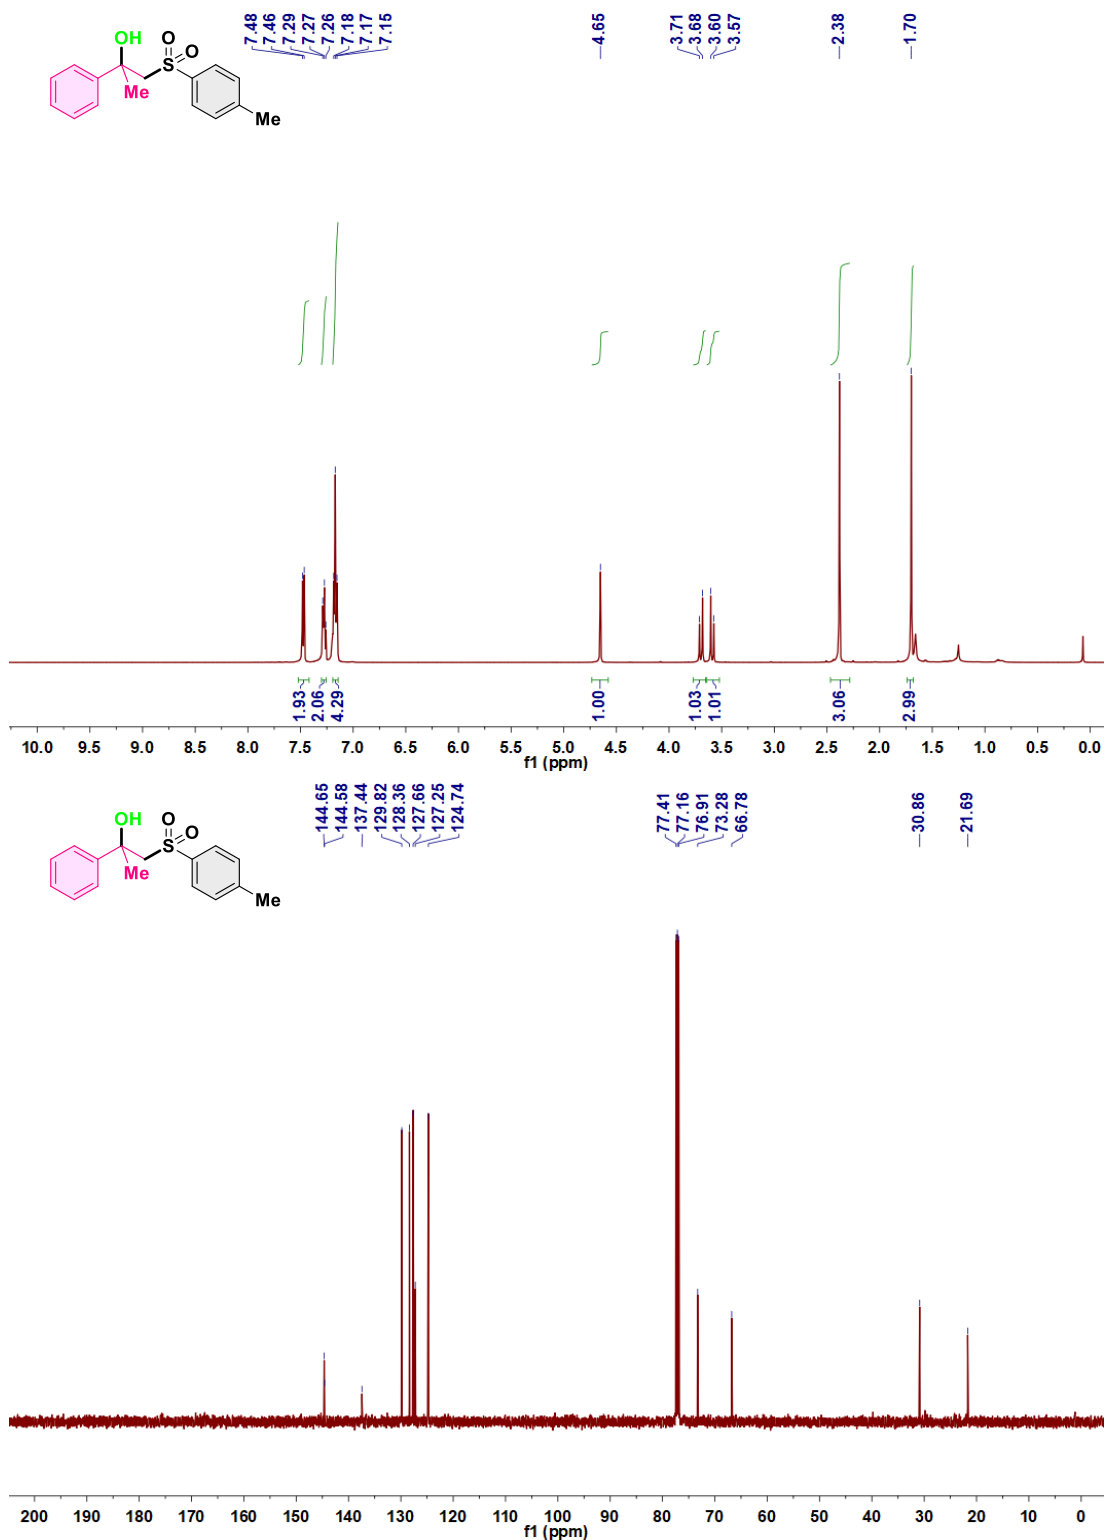

**Fig. S17.** <sup>1</sup>H (500 MHz) and <sup>13</sup>C (126 MHz) NMR spectra of 2-phenyl-1-tosylpropan-2-ol (**3Lb**) in CDCl<sub>3</sub>.

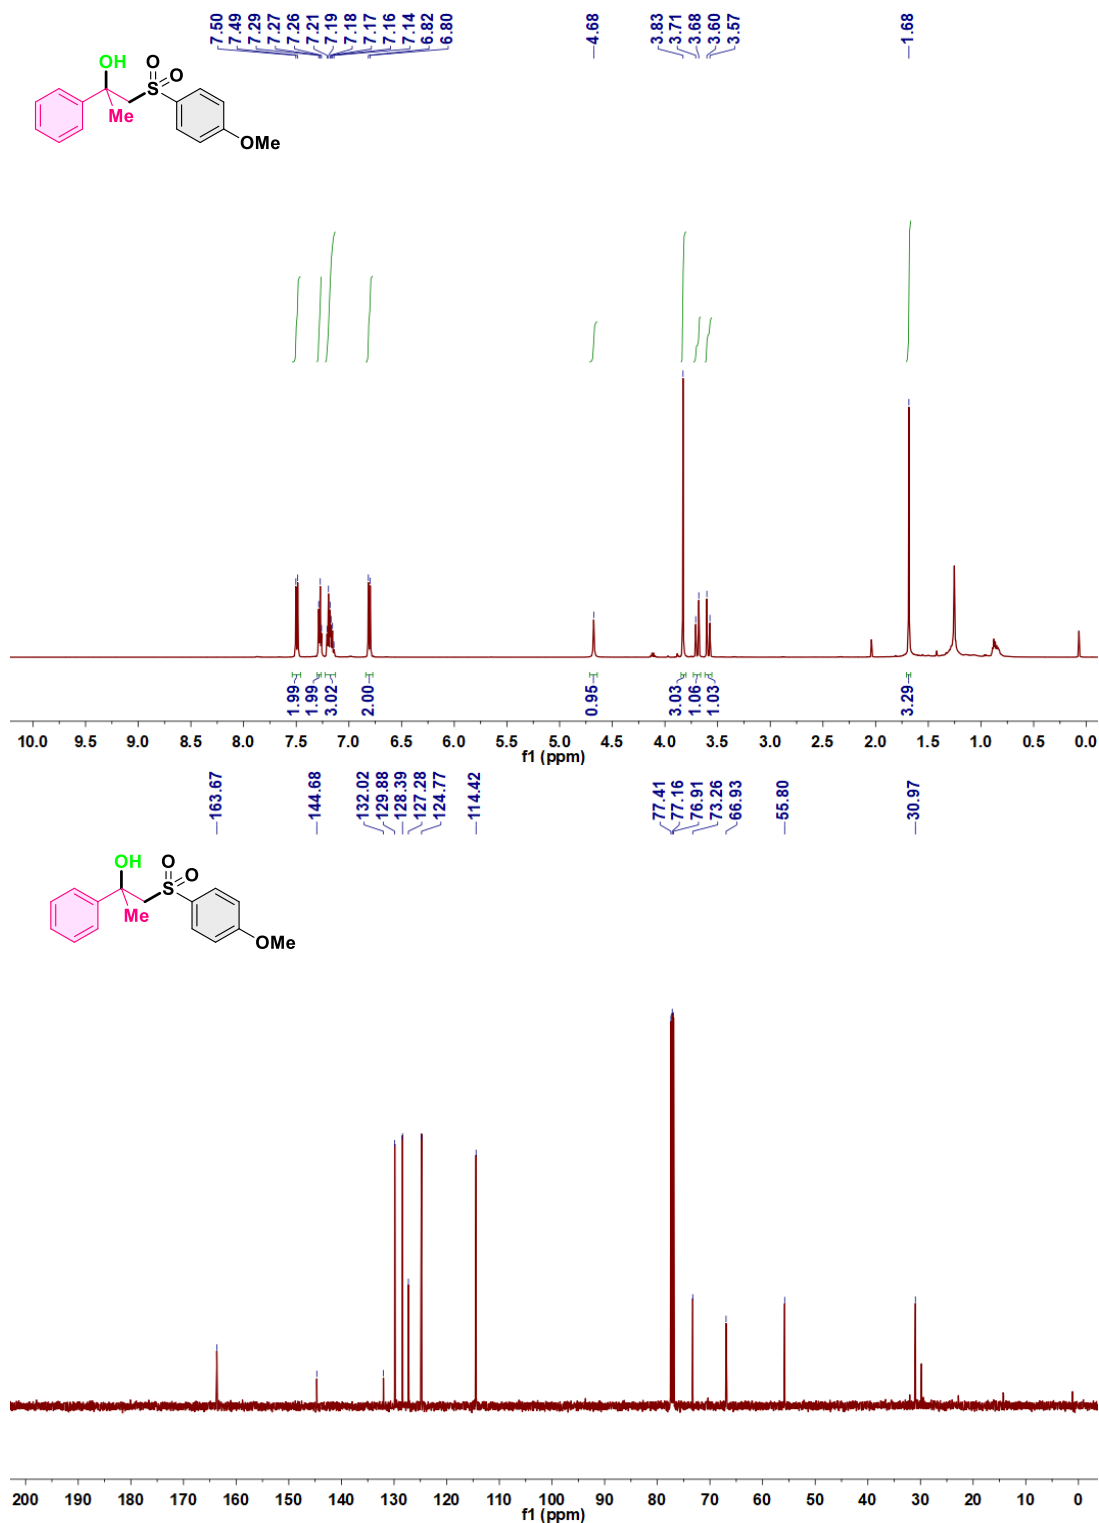

**Fig. S18.** <sup>1</sup>H (500 MHz) and <sup>13</sup>C (126 MHz) NMR spectra of 1-((4-methoxyphenyl)sulfonyl)-2-phenylpropan-2-ol (**3Ld**) in CDCl<sub>3</sub>.



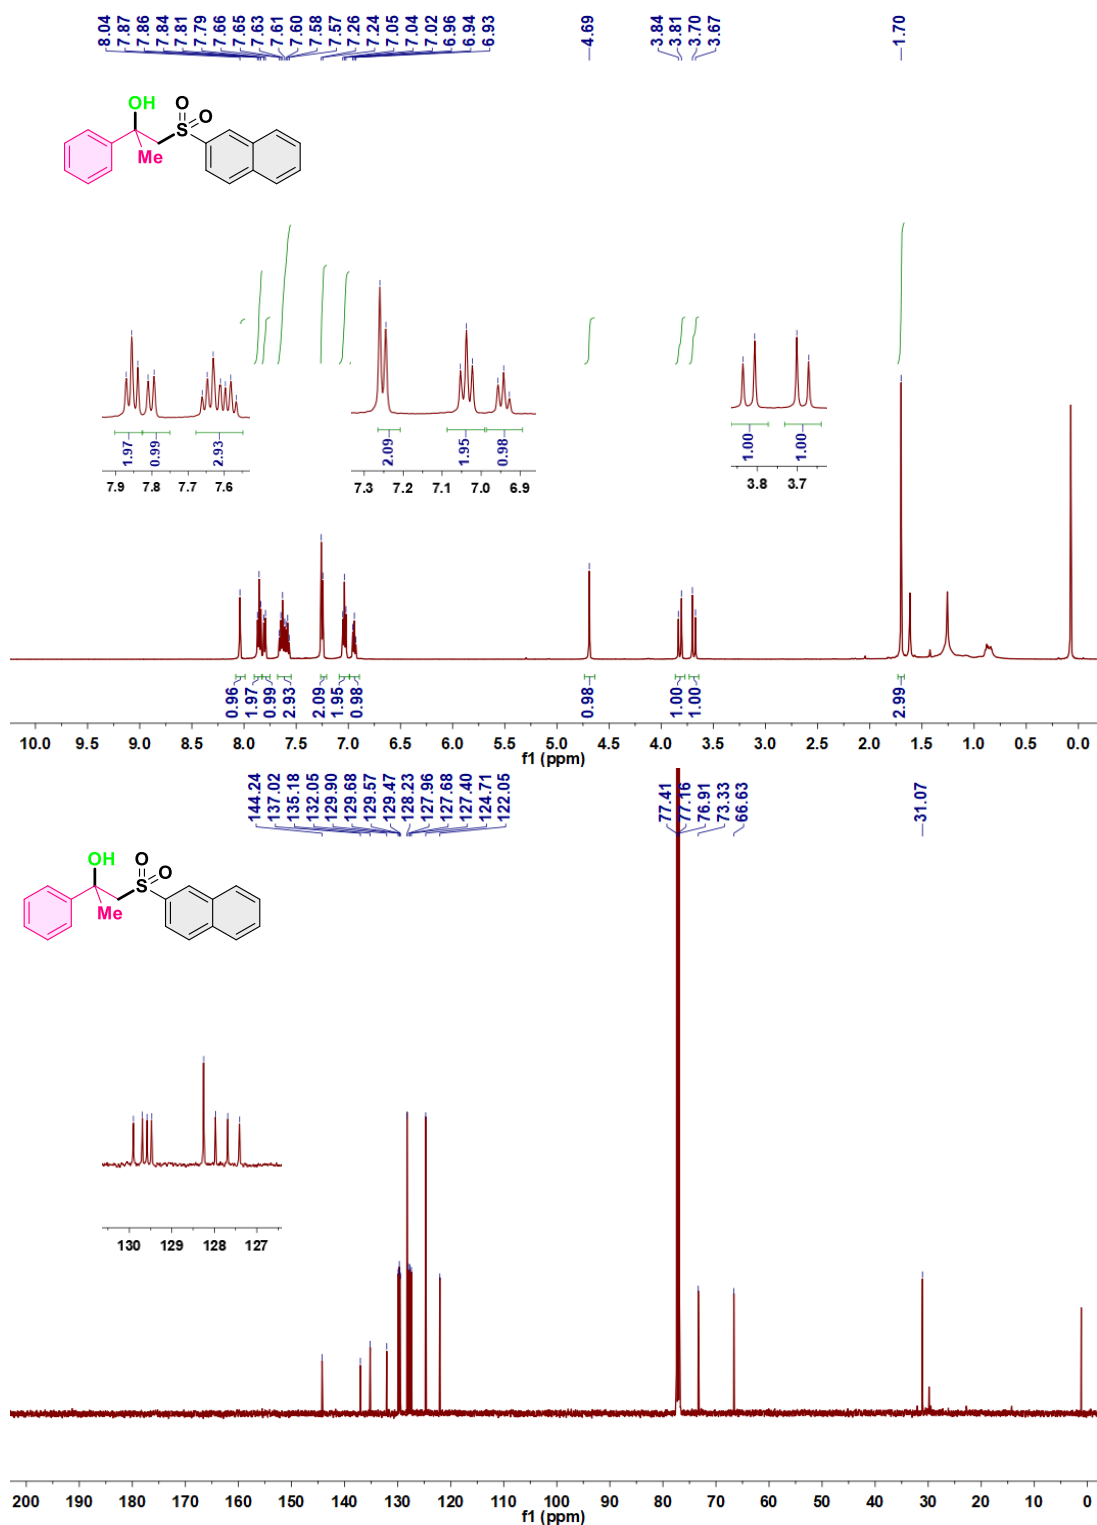

**Fig. S19.** <sup>1</sup>H (500 MHz) and <sup>13</sup>C (126 MHz) NMR spectra of 1-(naphthalen-2-ylsulfonyl)-2-phenylpropan-2-ol (**3Lf**) in CDCl<sub>3</sub>.

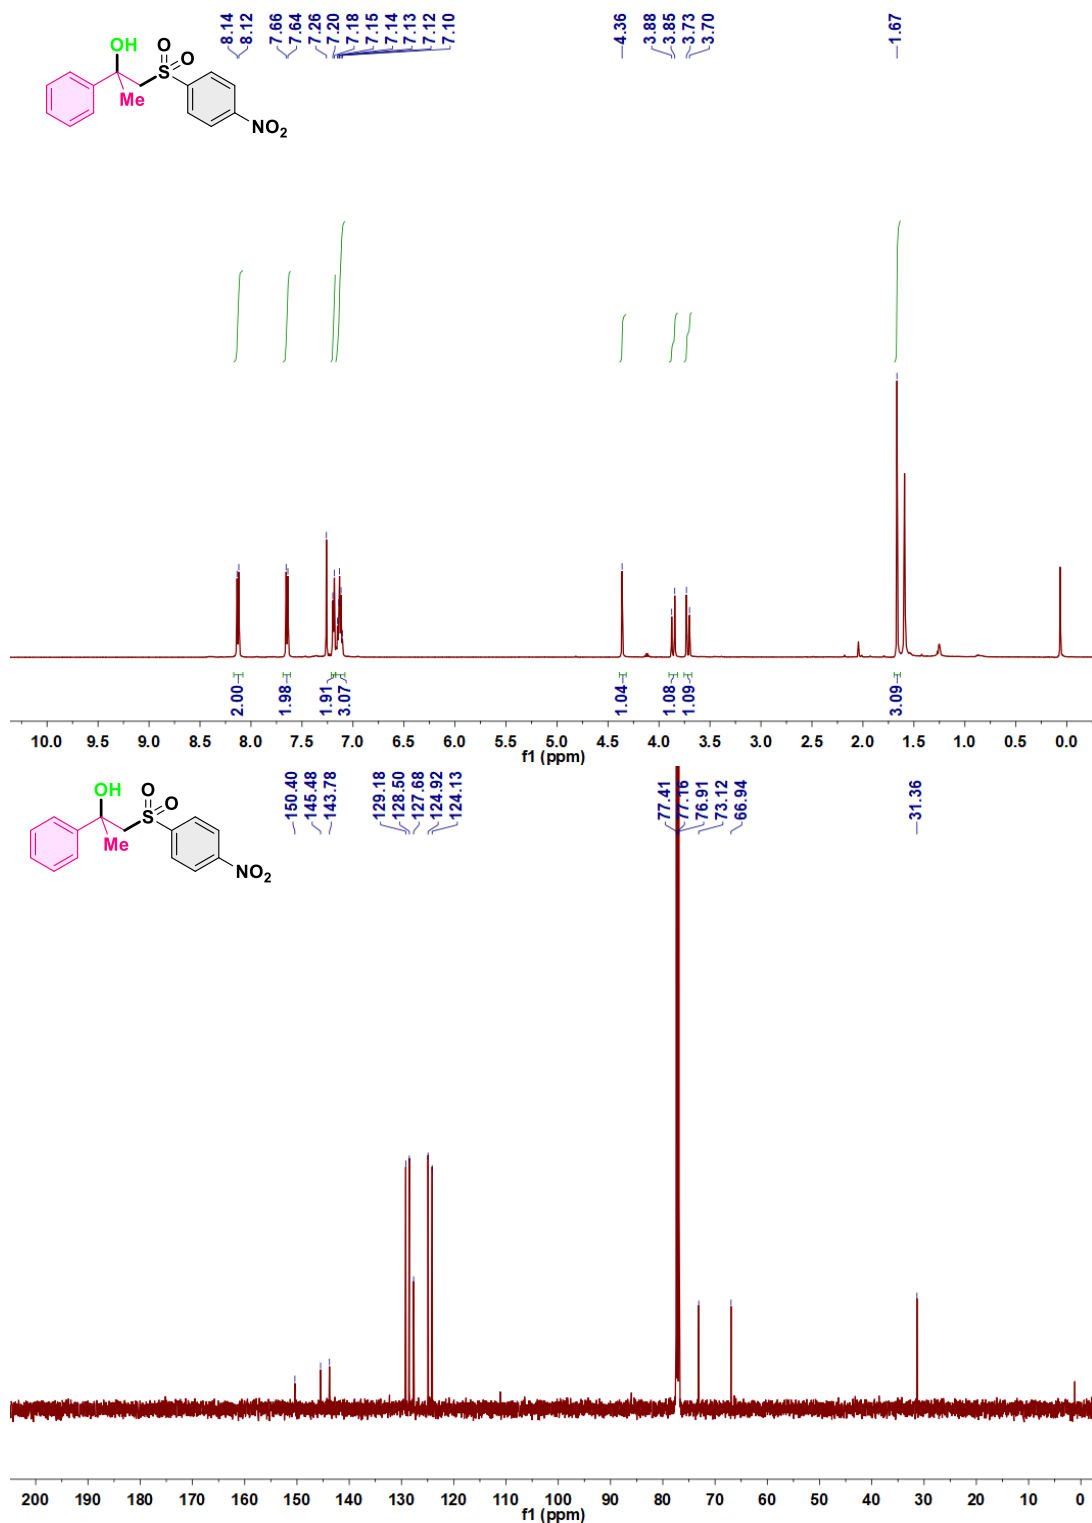

**Fig. S20.** <sup>1</sup>H (500 MHz) and <sup>13</sup>C (126 MHz) NMR spectra of 1-((4-nitrophenyl)sulfonyl)-2-phenylpropan-2-ol (**3Lg**) in CDCl<sub>3</sub>.

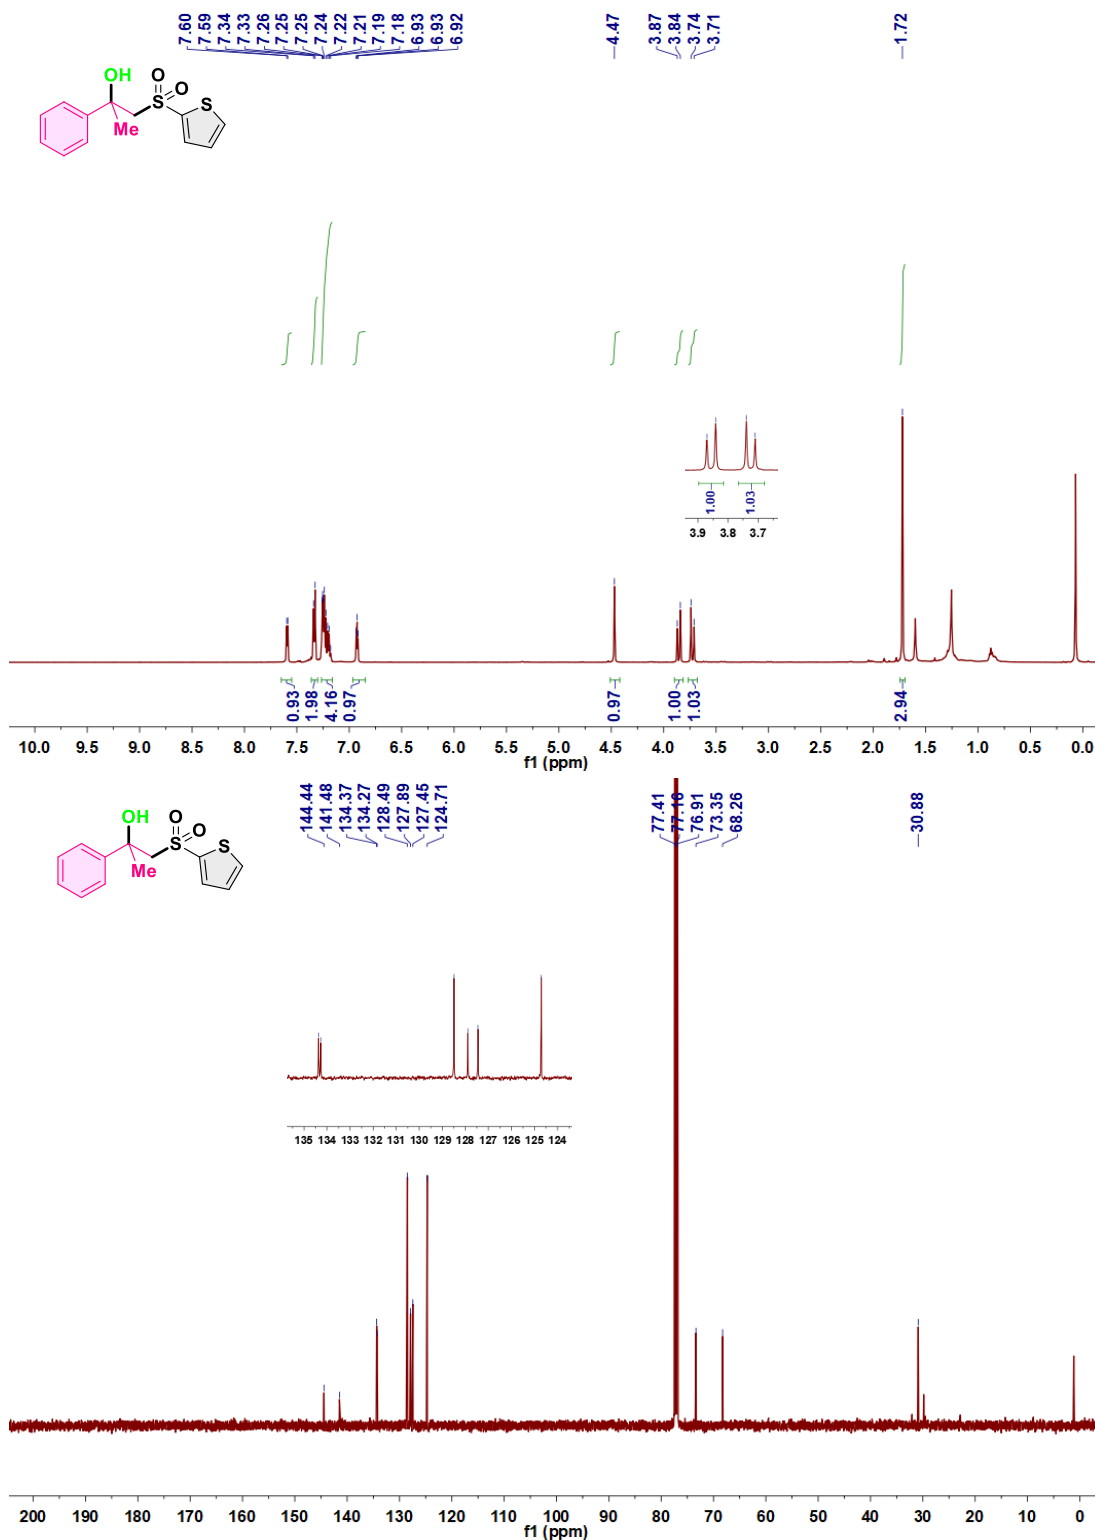

**Fig. S21.** <sup>1</sup>H (500 MHz) and <sup>13</sup>C (126 MHz) NMR spectra of 2-phenyl-1-(thiophen-2-ylsulfonyl)propan-2-ol (**3Li**) in CDCl<sub>3</sub>.

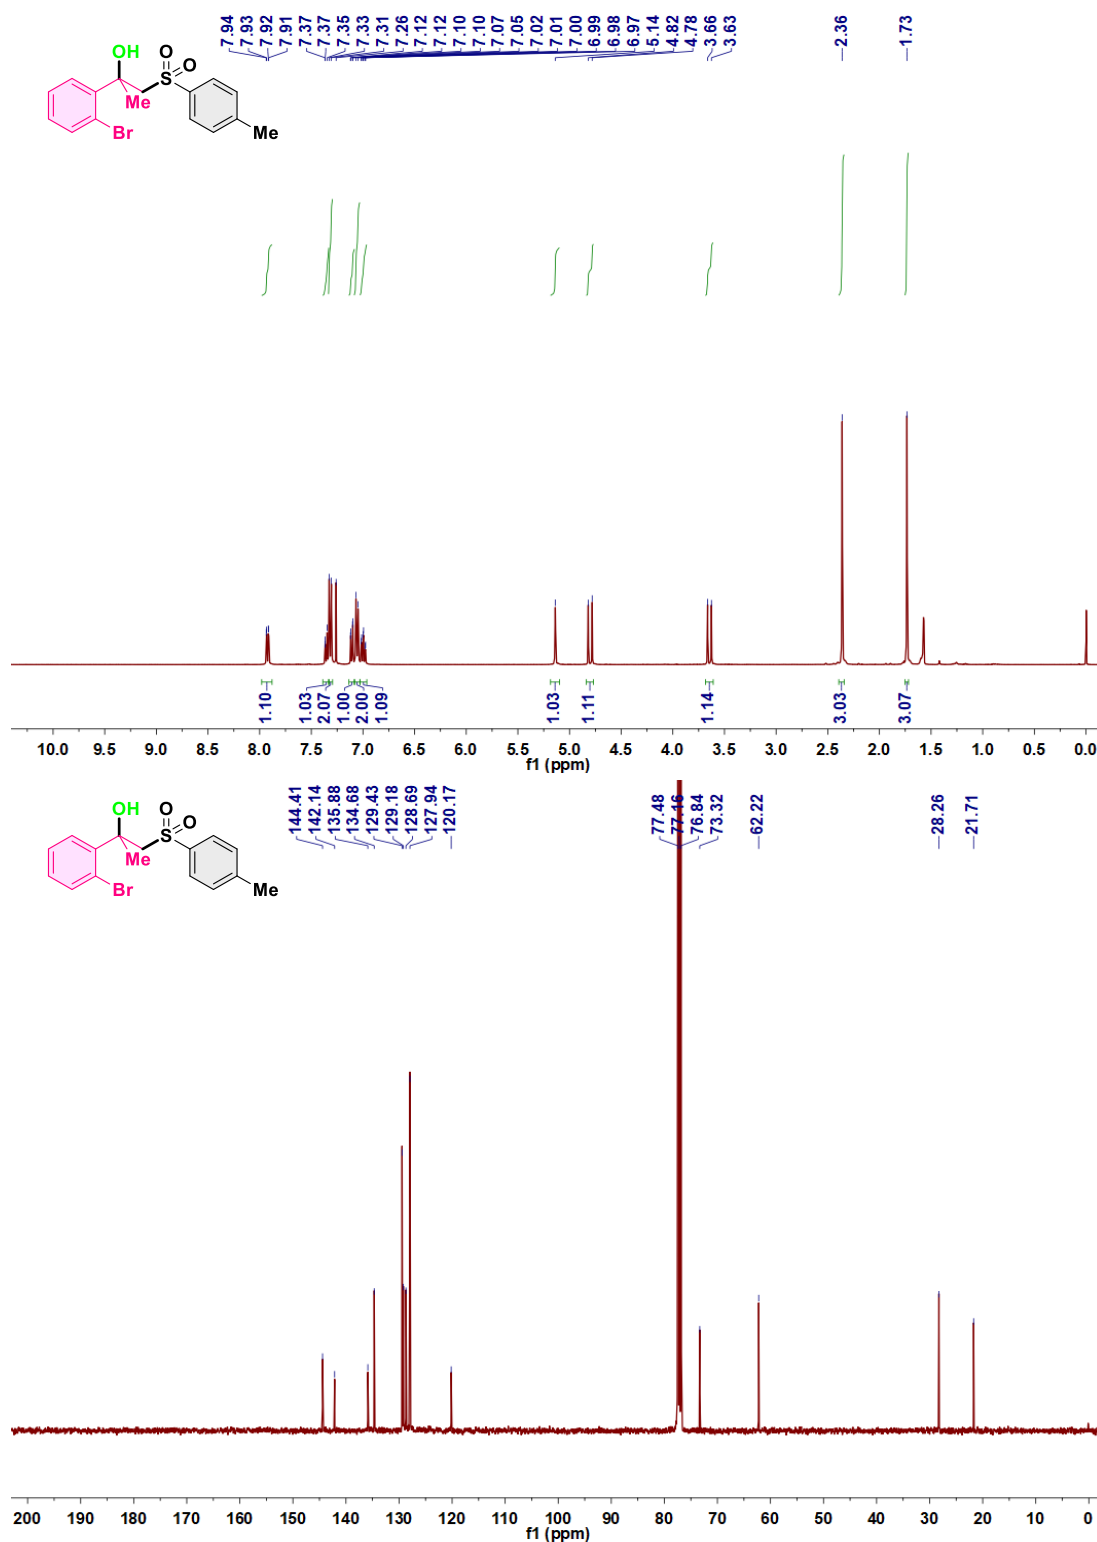

**Fig. S22.** <sup>1</sup>H (400 MHz) and <sup>13</sup>C (101 MHz) NMR spectra of 2-(2-bromophenyl)-1-tosylpropan-2-ol (**3Mb**) in CDCl<sub>3</sub>.

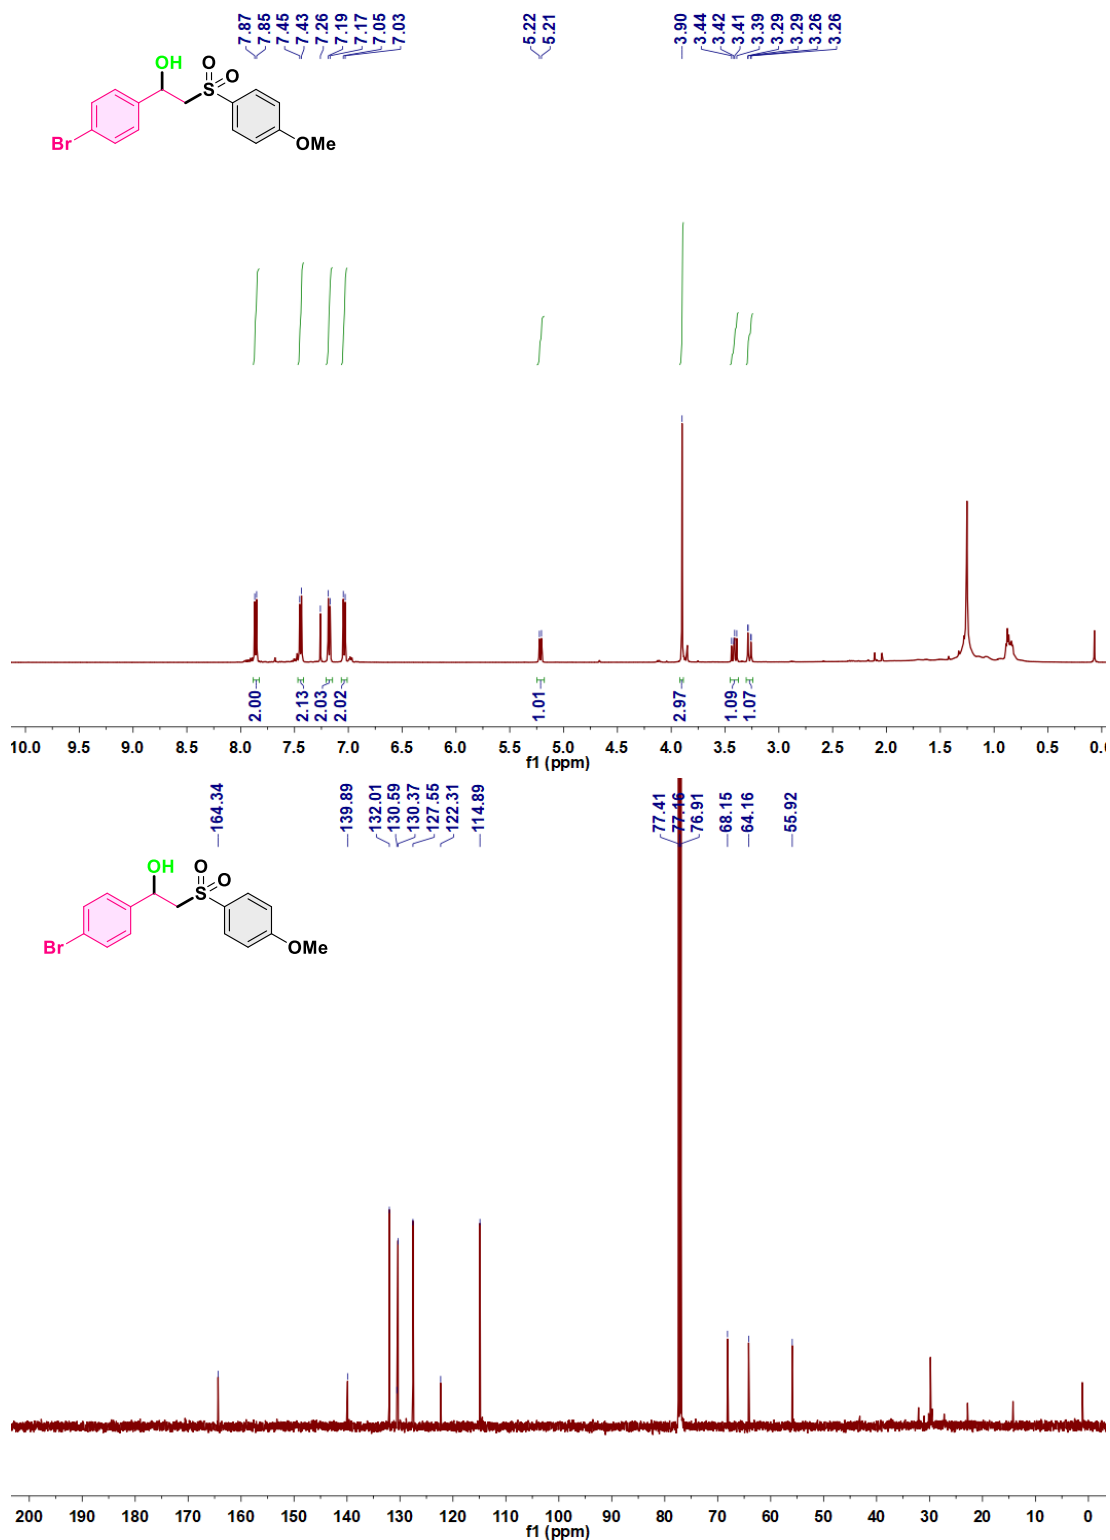

**Fig. S23.** <sup>1</sup>H (500 MHz) and <sup>13</sup>C (126 MHz) NMR spectra of 1-(4-bromophenyl)-2-((4-methoxyphenyl)sulfonyl)ethan-1-ol (**3Fd**) in CDCl<sub>3</sub>.

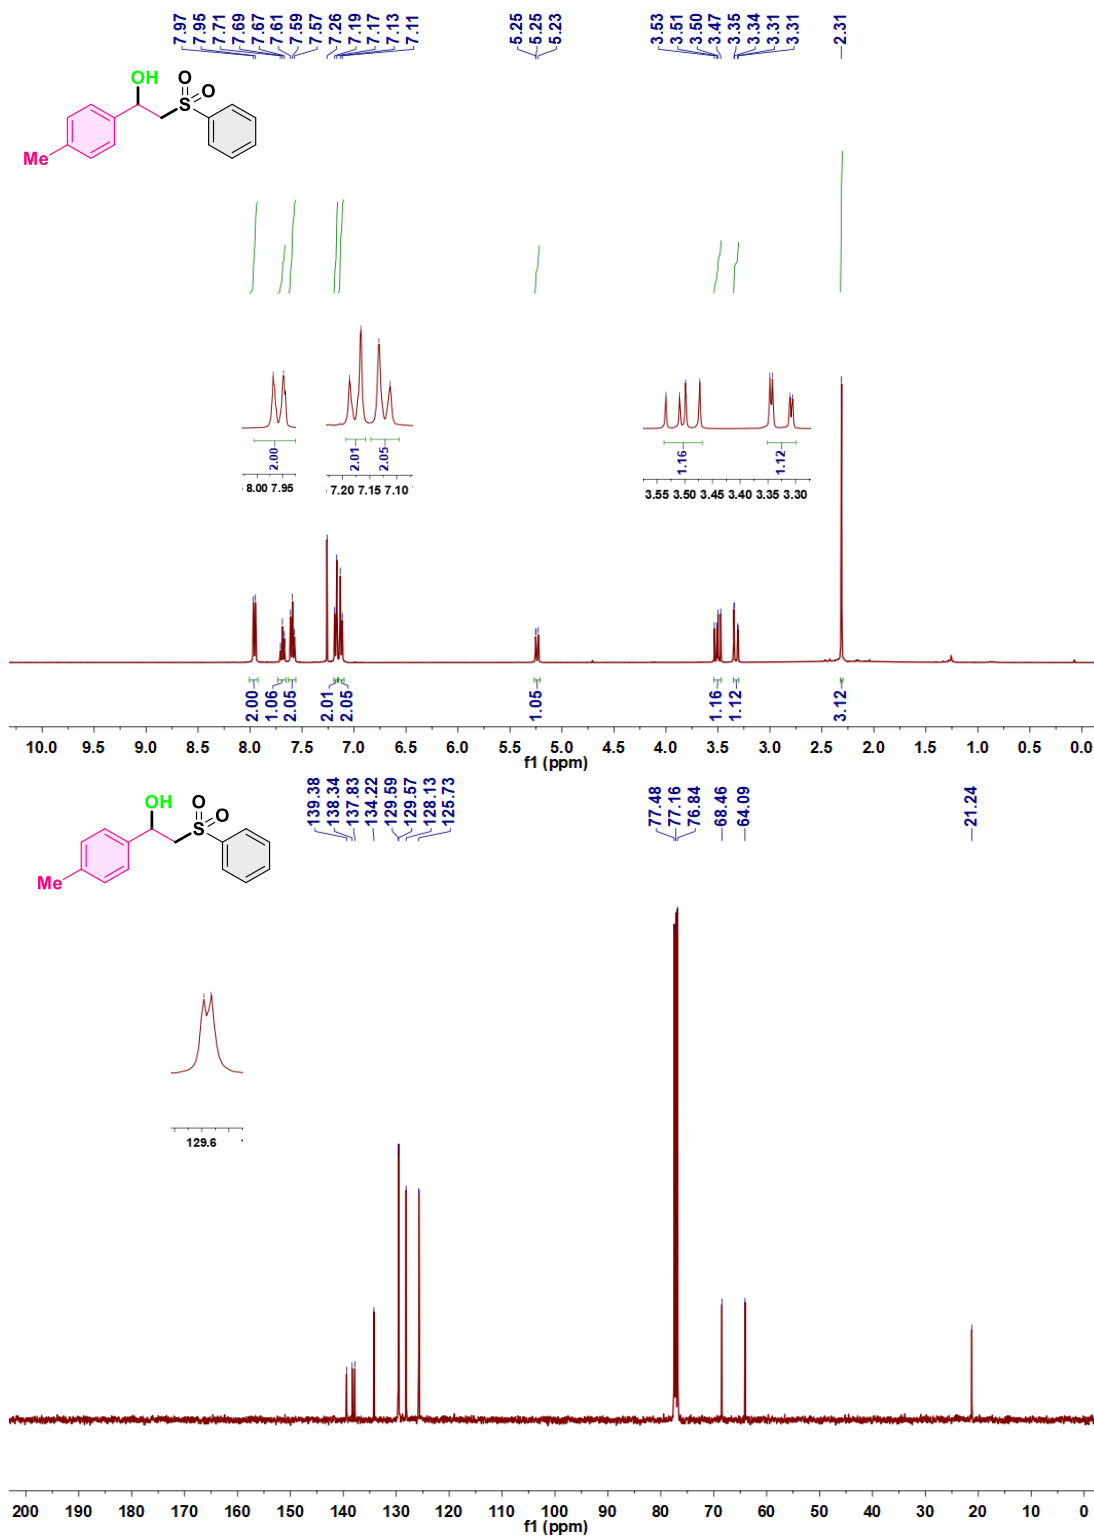

**Fig. S24.** <sup>1</sup>H (400 MHz) and <sup>13</sup>C (101 MHz) NMR spectra of 2-(phenylsulfonyl)-1-(*p*-tolyl)ethan-1-ol (**3Ba**) in CDCl<sub>3</sub>.

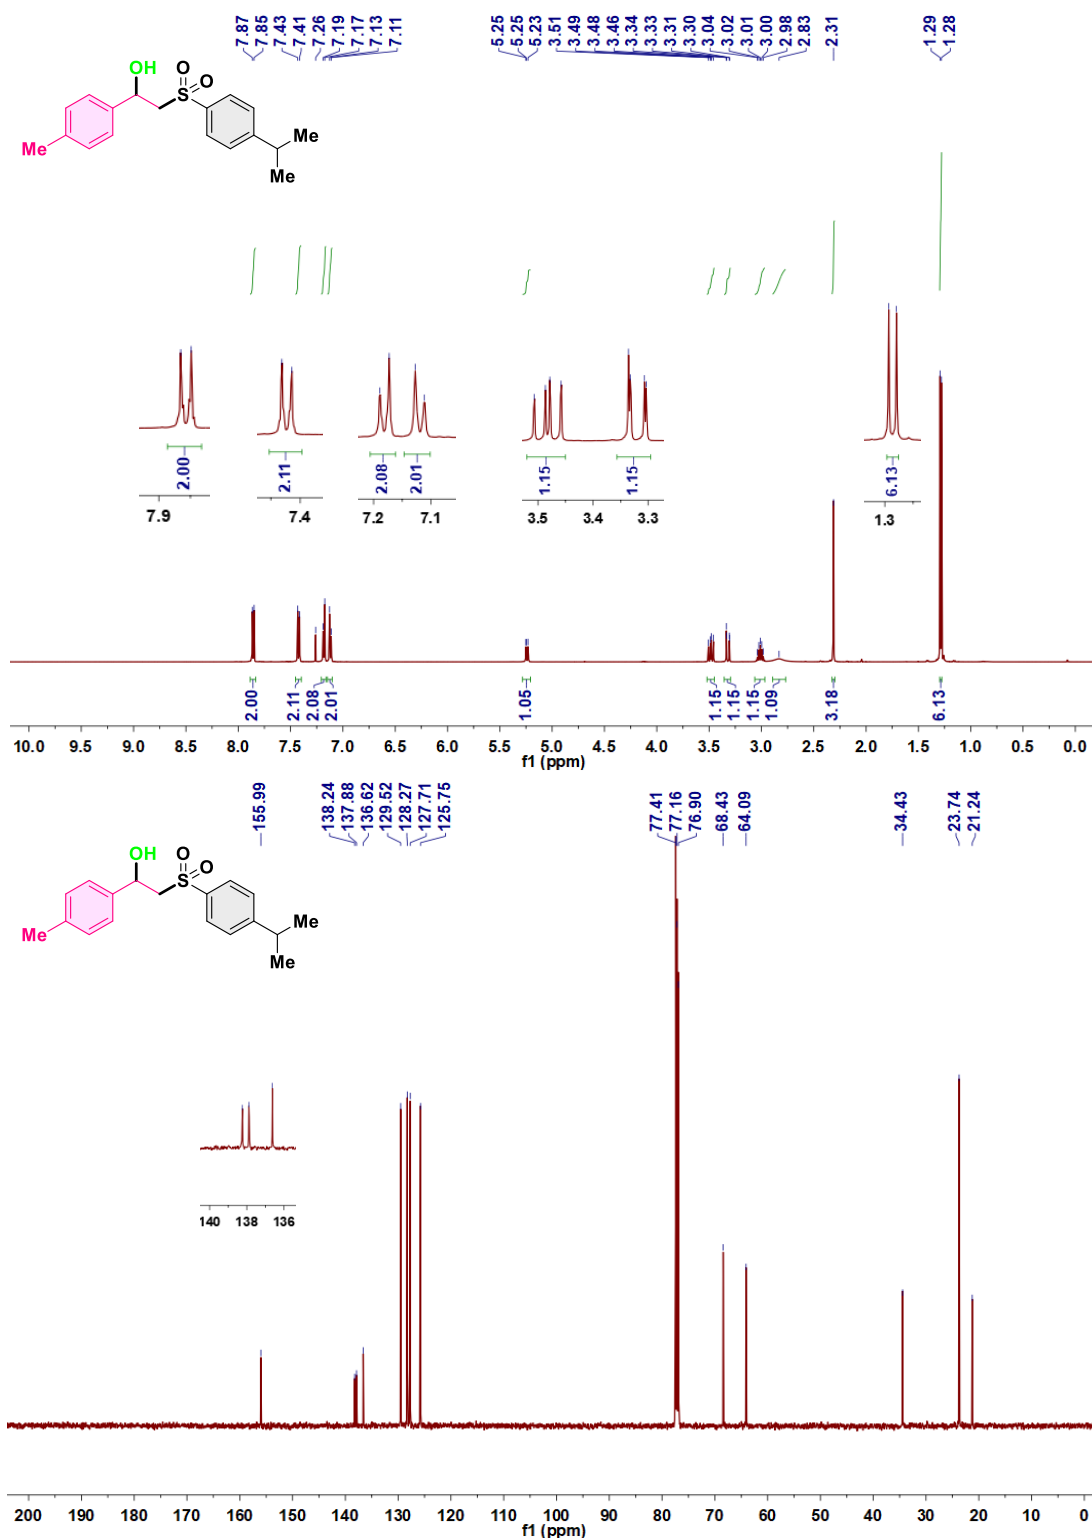

**Fig. S25.** <sup>1</sup>H (500 MHz) and <sup>13</sup>C (126 MHz) NMR spectra of 2-((4-isopropylphenyl)sulfonyl)-1-(*p*-tolyl)ethan-1-ol (**3Bc**) in CDCl<sub>3</sub>.

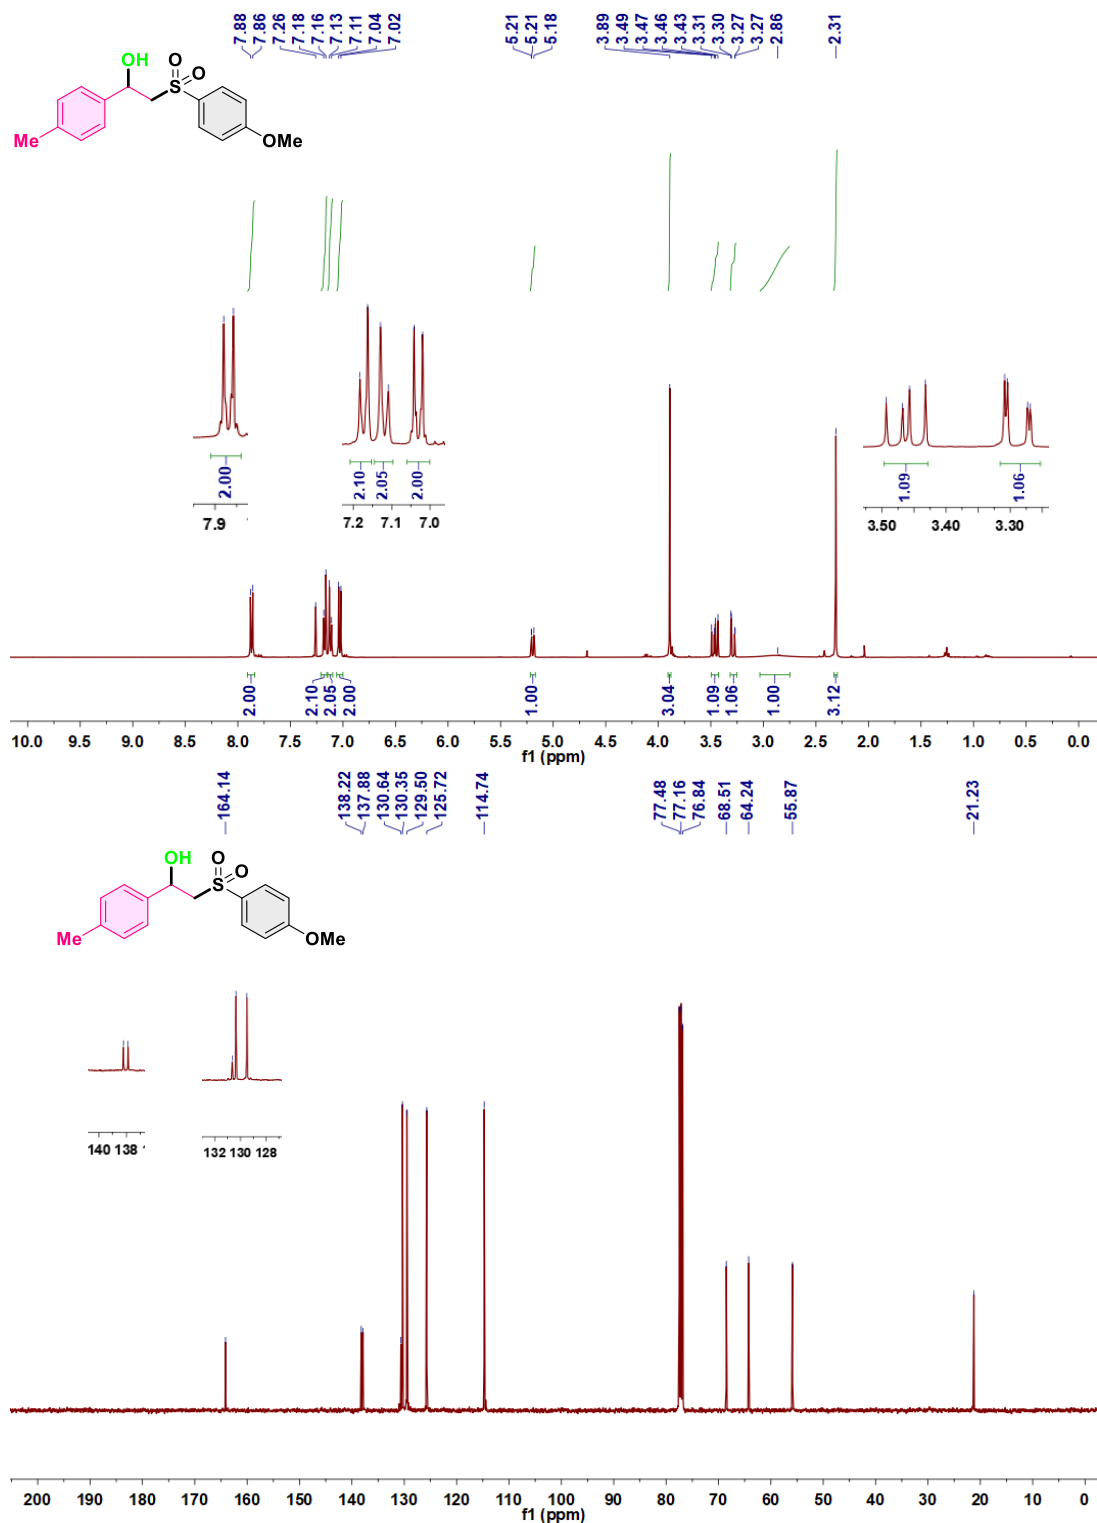

**Fig. S26.** <sup>1</sup>H (400 MHz) and <sup>13</sup>C (101 MHz) NMR spectra of 2-((4-methoxyphenyl)sulfonyl)-1-(*p*-tolyl)ethan-1-ol (**3Bd**) in CDCl<sub>3</sub>.



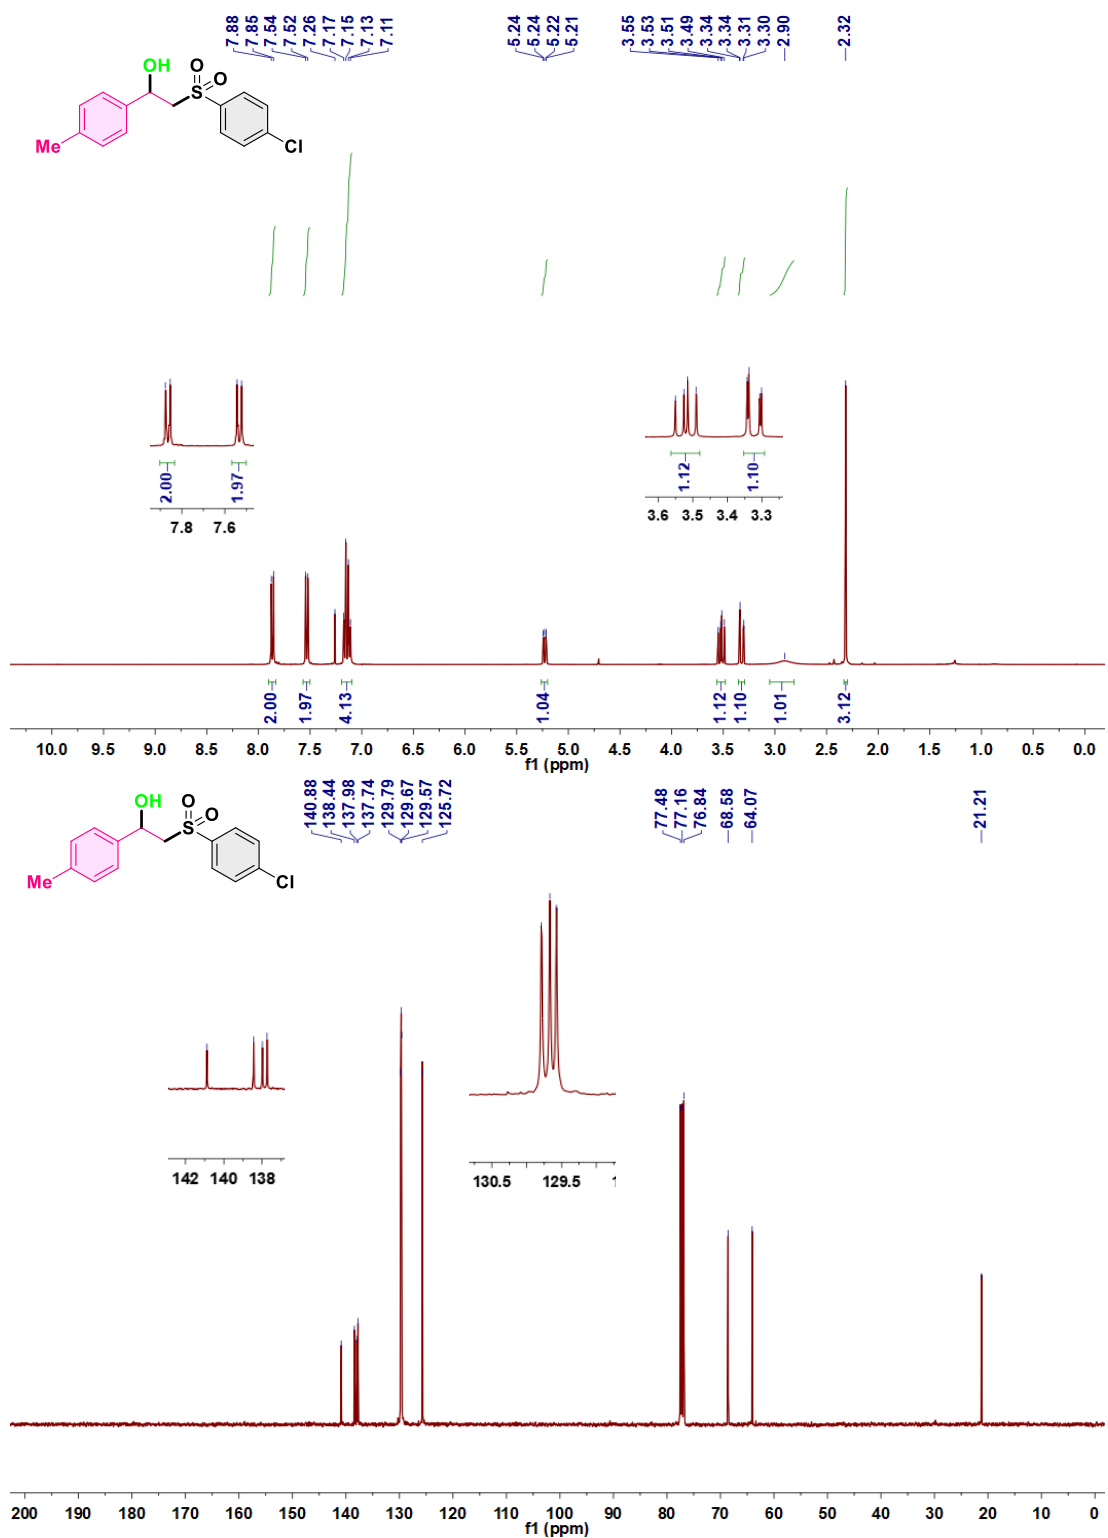

**Fig. S27.** <sup>1</sup>H (400 MHz) and <sup>13</sup>C NMR (126 MHz) spectra of 2-((4-chlorophenyl)sulfonyl)-1-(*p*-tolyl)ethan-1-ol (**3Be**) in CDCl<sub>3</sub>.

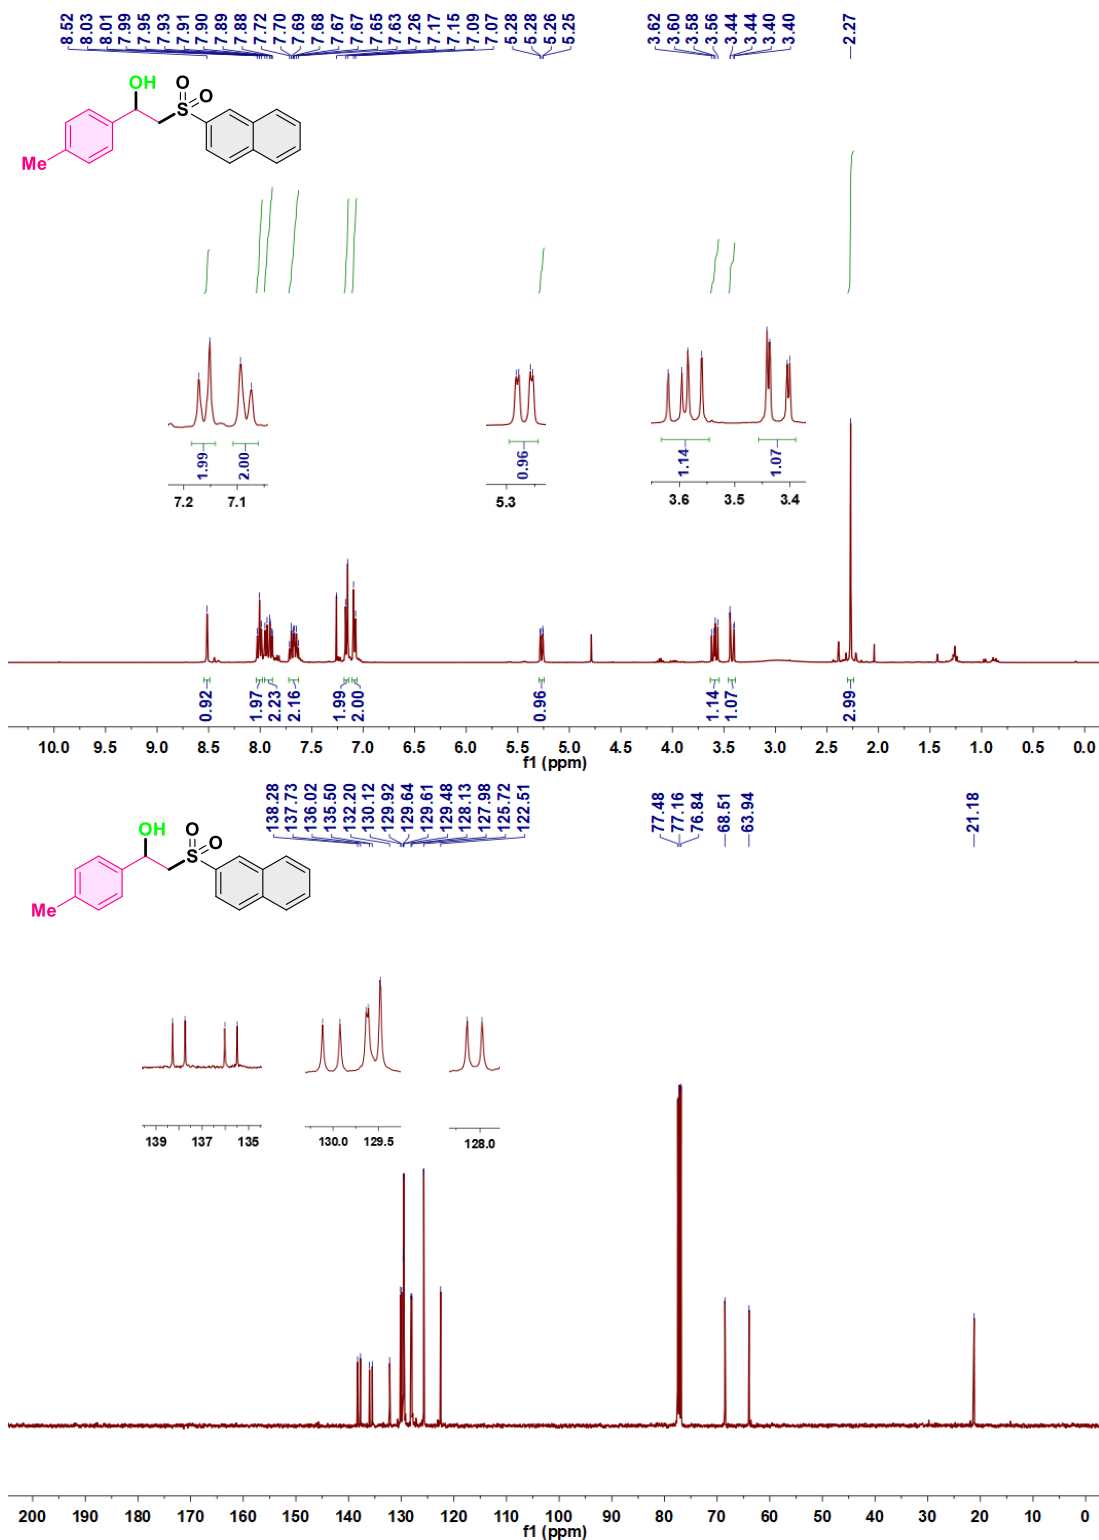

**Fig. S28.** <sup>1</sup>H (400 MHz) and <sup>13</sup>C (126 MHz) NMR spectra of 2-(naphthalen-2-ylsulfonyl)-1-(*p*-tolyl)ethan-1-ol (**3Bf**) in CDCl<sub>3</sub>.

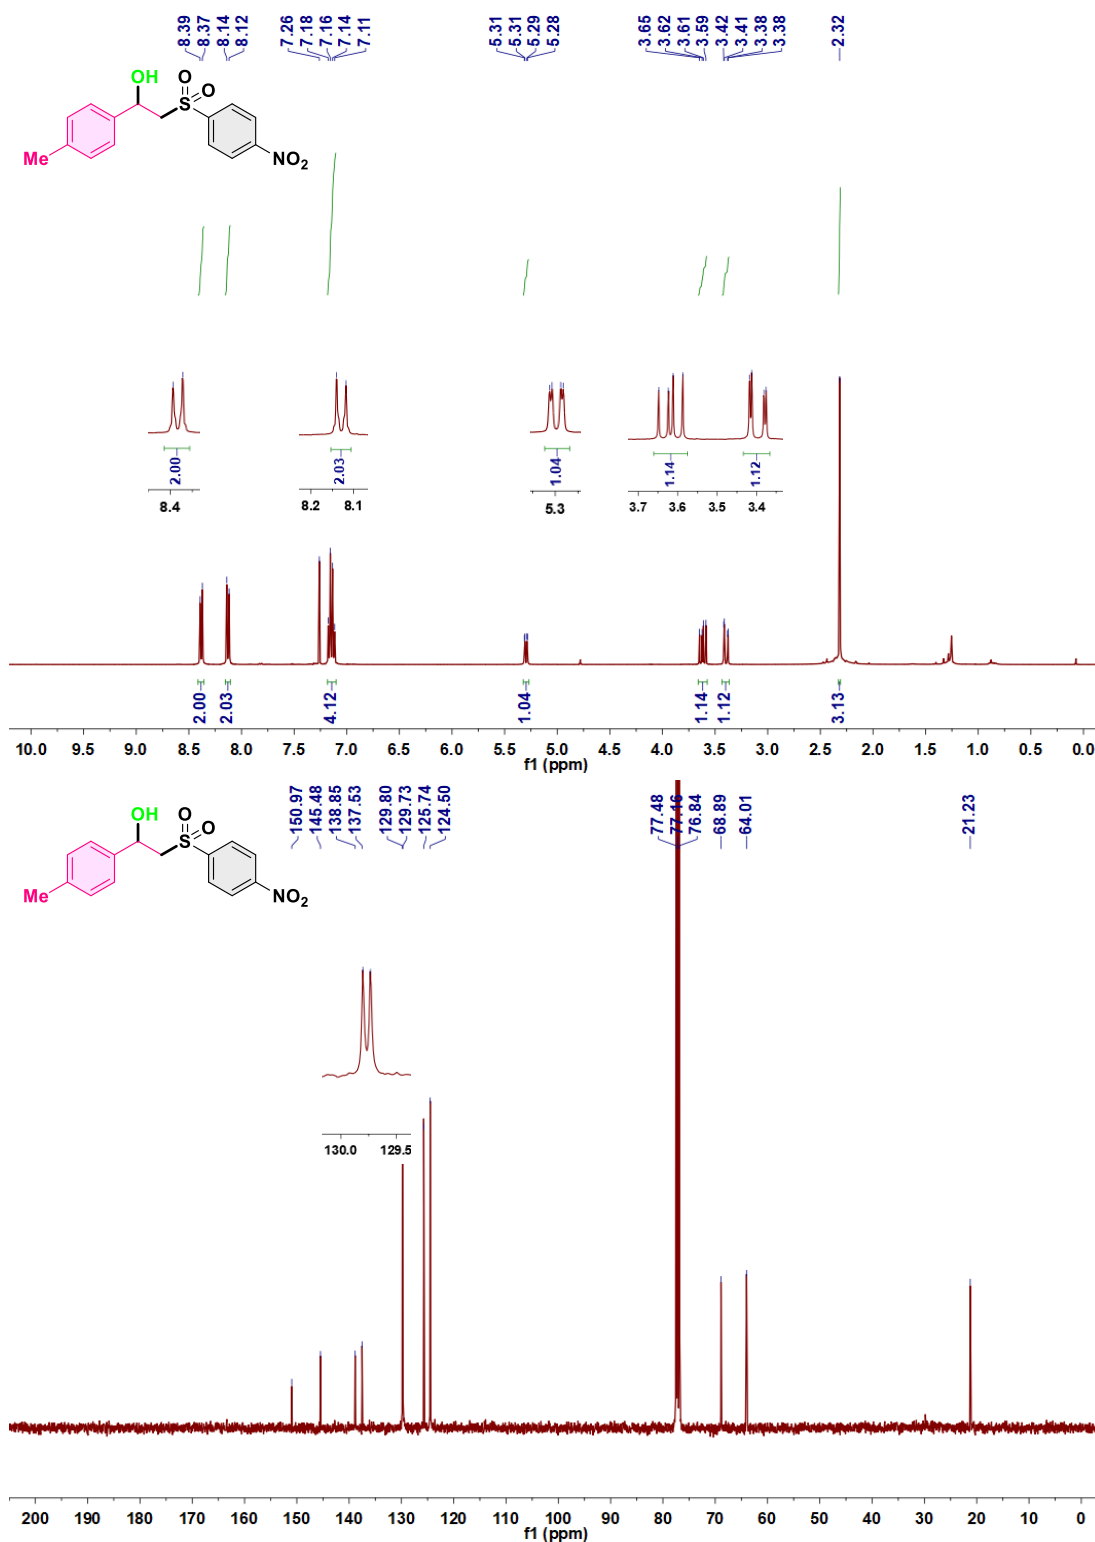

**Fig. S29.** <sup>1</sup>H (400 MHz) and <sup>13</sup>C (101 MHz) NMR spectra of 2-((4-nitrophenyl)sulfonyl)-1-(p-tolylethanol) (**3Bg**) in CDCl<sub>3</sub>.

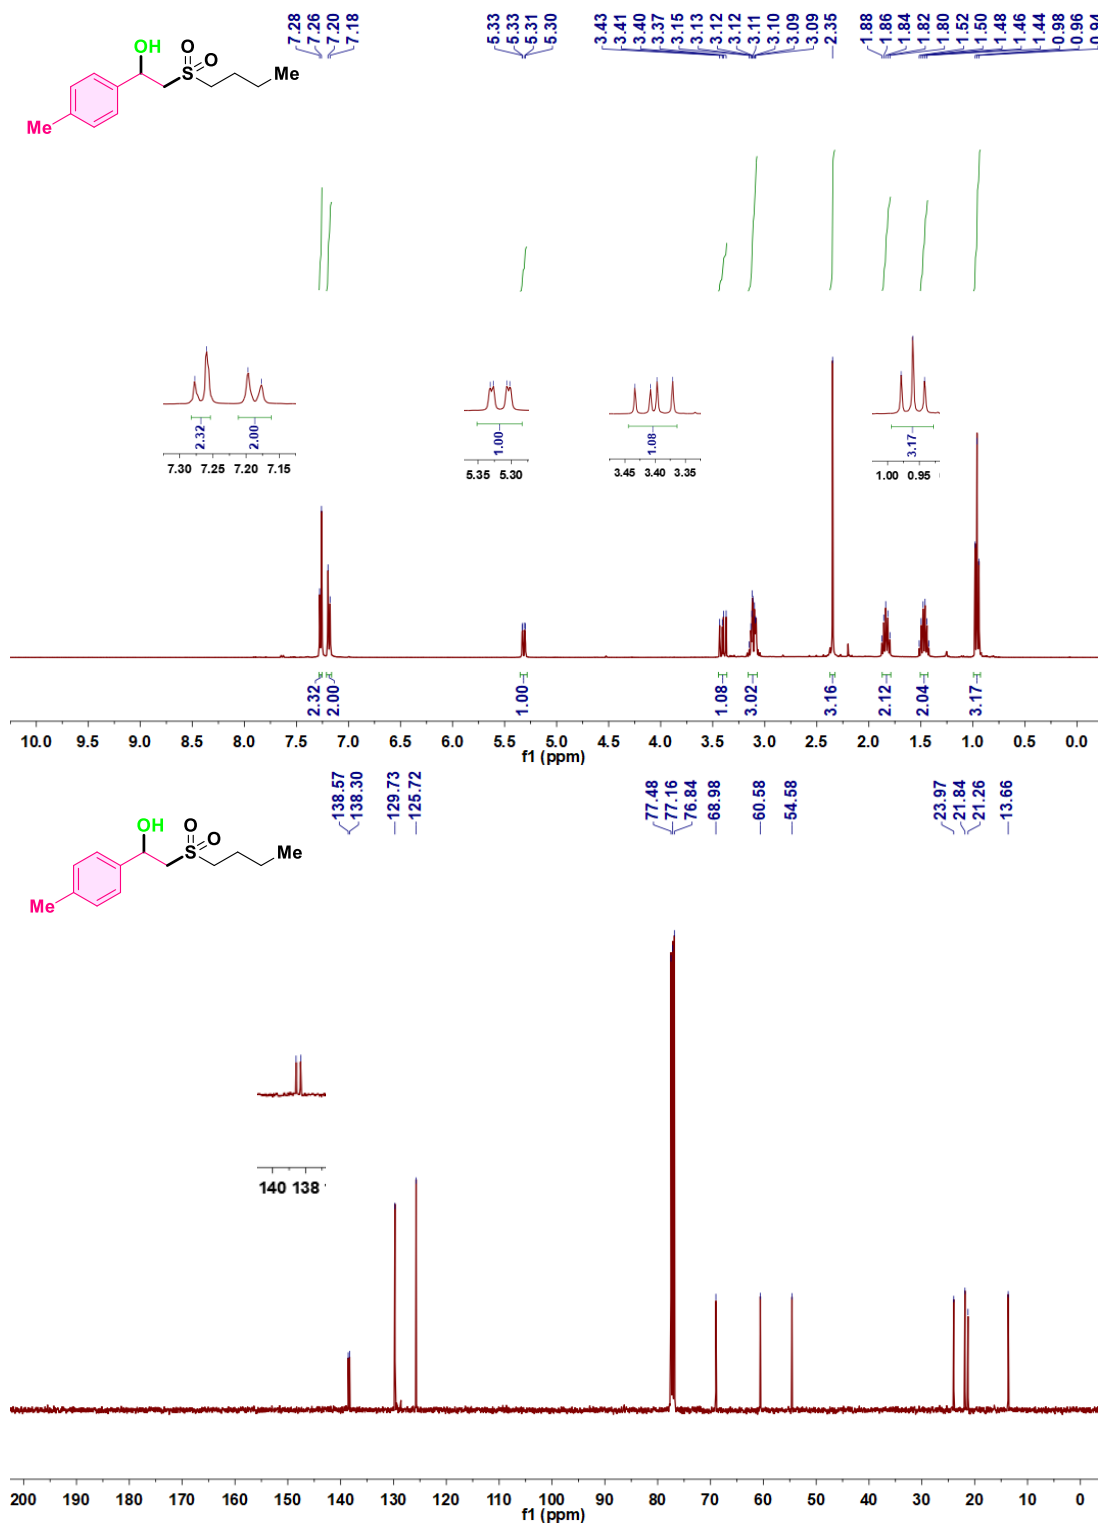

**Fig. S30.** <sup>1</sup>H (400 MHz) and <sup>13</sup>C (101 MHz) NMR spectra of 2-(*n*-butylsulfonyl)-1-(*p*-tolylethanol) (**3Bh**) in CDCl<sub>3</sub>.

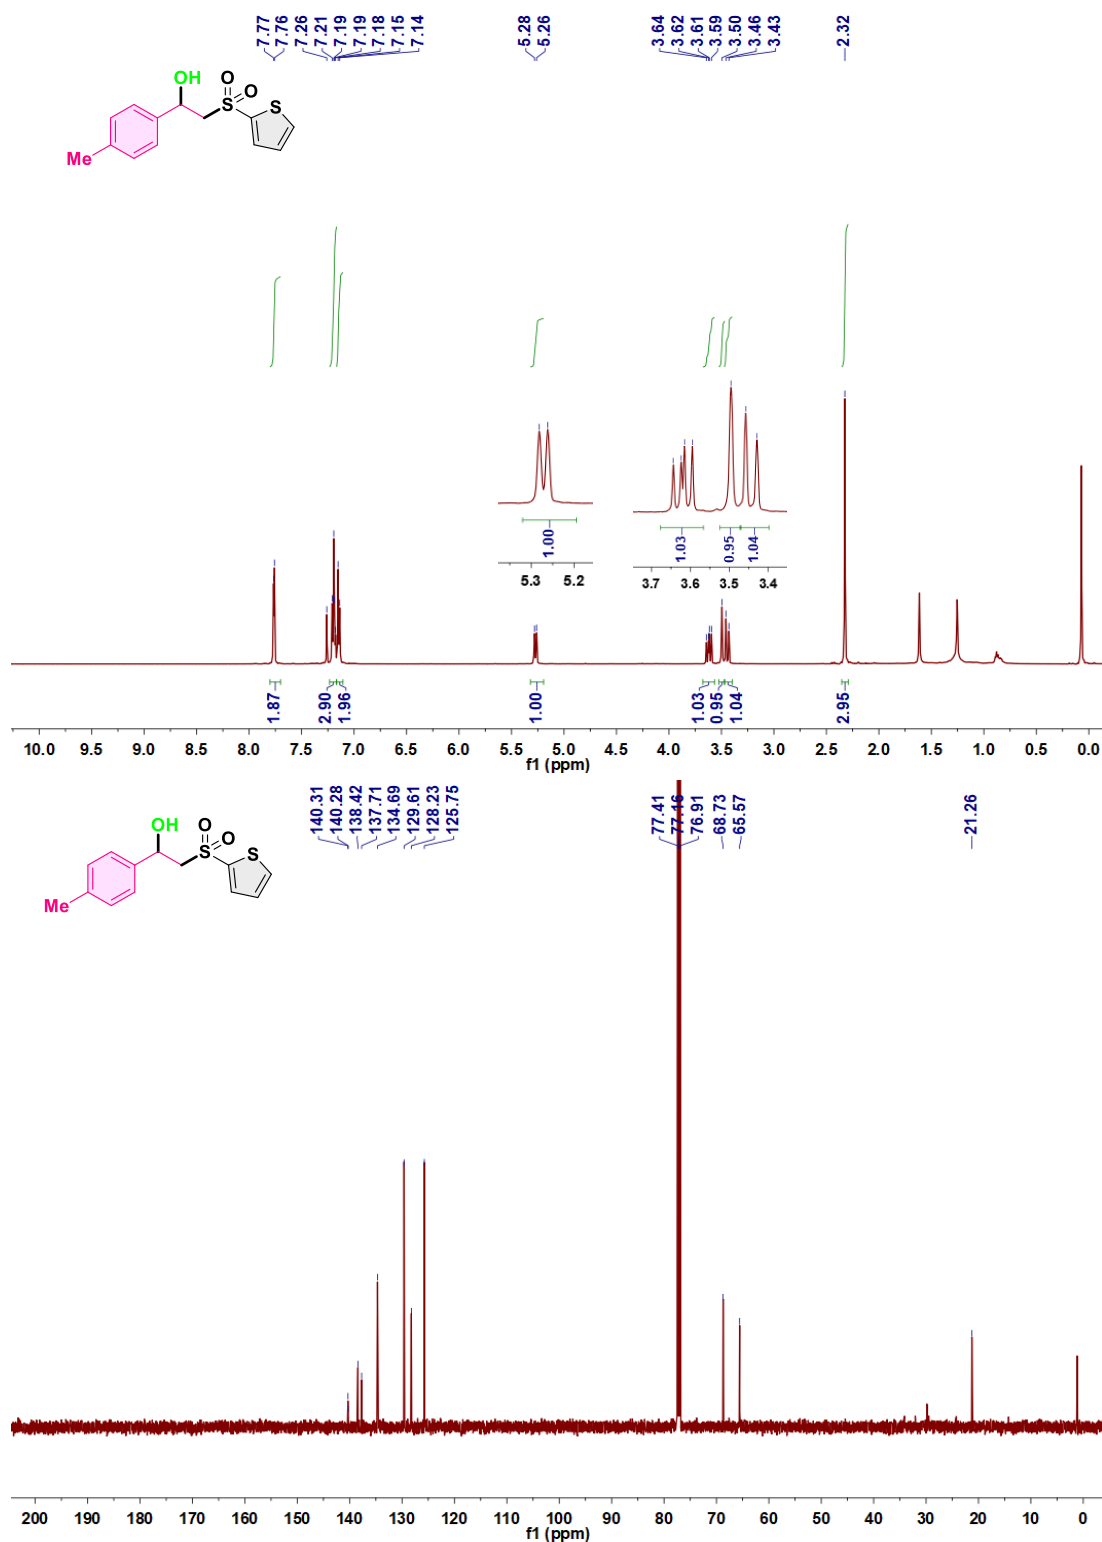

**Fig. S31.** <sup>1</sup>H (500 MHz) and <sup>13</sup>C (126 MHz) NMR spectra of 2-(thiophen-2-ylsulfonyl)-1-(*p*-tolyl)ethan-1-ol (**3Bi**) in CDCl<sub>3</sub>.

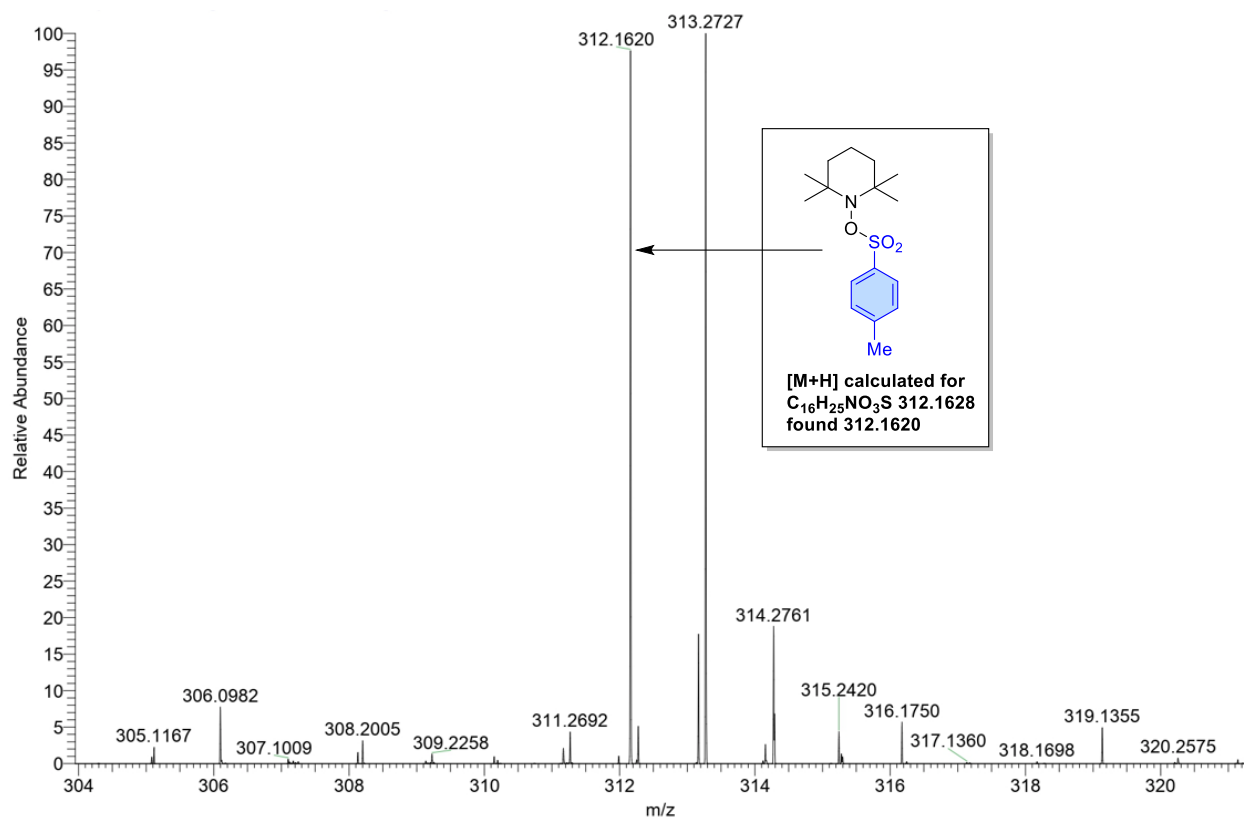

**Fig. S32:** HR-MS spectrum of the reaction mixture in the presence of TEMPO.

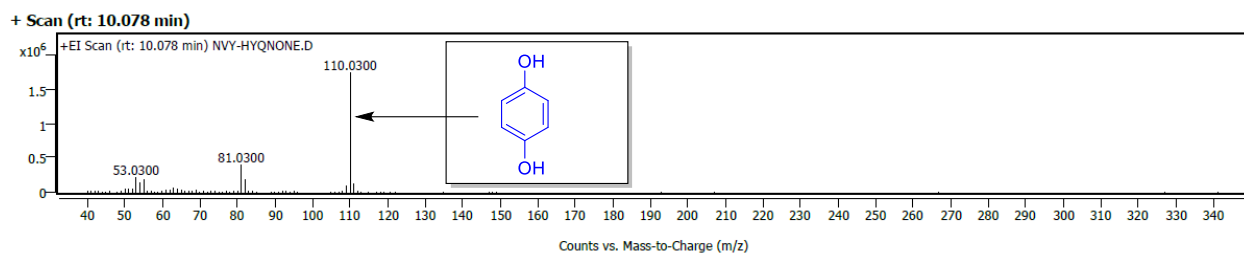

**Fig.S33:** GC-MS (EI) spectrum of the reaction mixture in the presence of *p*-benzoquinone.

## References:

- (1) Q. Lu, J. Zhang, F. Wei, Y. Qi, H. Wang, Z. Liu and A. Lei, *Angew. Chem. Int. Ed.* 2013, **52**, 7156–7159.
- (2) N. Taniguchi, *J. Org. Chem.* 2015, **80**, 7797–7802.
- (3) S. K. Pagire, S. Paria and O. Reiser, *Org. Lett.* 2016, **18**, 2106–2109.
- (4) K. Choudhuri, T. K. Achar and P. Mal, *Adv. Synth. Catal.* 2017, **359**, 3566–3576.
- (5) Y. Wang, W. Jiang and C. Huo, *J. Org. Chem.* 2017, **82**, 10628–1063.
- (6) S. Son, P. K. Shyam, H. Park, I. Jeong and H.-Y. Jang, *Eur. J. Org. Chem.* 2018, 3365–3371.
- (7) M.-j. Bu, C. Cai, F. Gallou and B. H. Lipshutz, *Green Chem.* 2018, **20**, 1233–1237.
